# Supplementary material for: Theoretical mechanistic investigation of zinc(ii) catalyzed oxidation of alcohols to aldehydes and esters
Source: Royal Society of Chemistry journal article supplement (doi:10.1039/c5ra23096a), 2016-01-01
Supplement: c5ra23096a1.pdf [file c5ra23096a1.pdf]

## *Supporting Information*

# **Theoretical Mechanistic Investigation of Zinc(II) Catalyzed Oxidation of Alcohols to Aldehydes and Esters**

Riffat Un Nisa<sup>a</sup>, Tariq Mahmood<sup>a</sup>, Ralf Ludwig<sup>b,c</sup>, Khurshid Ayub<sup>\*a</sup>

*<sup>a</sup> Department of Chemistry, COMSATS Institute for Information Technology, Campus  
Abbottabad, Abbottabad, Pakistan*

*<sup>b</sup> Leibniz-Institut für Katalyse e. V. an der Universität Rostock, Albert-Einstein-Str. 29a, 18059  
Rostock, Germany*

*<sup>c</sup> Department of Physical Chemistry, University of Rostock, Dr.-Lorenz-Weg 1, 18059 Rostock,  
Germany*

To Whom correspondence should be addressed:

Khurshid Ayub

E-Mail: [khurshid@ciit.net.pk](mailto:khurshid@ciit.net.pk)

Ph: +92-992-383591

Fax: +92-992-383441

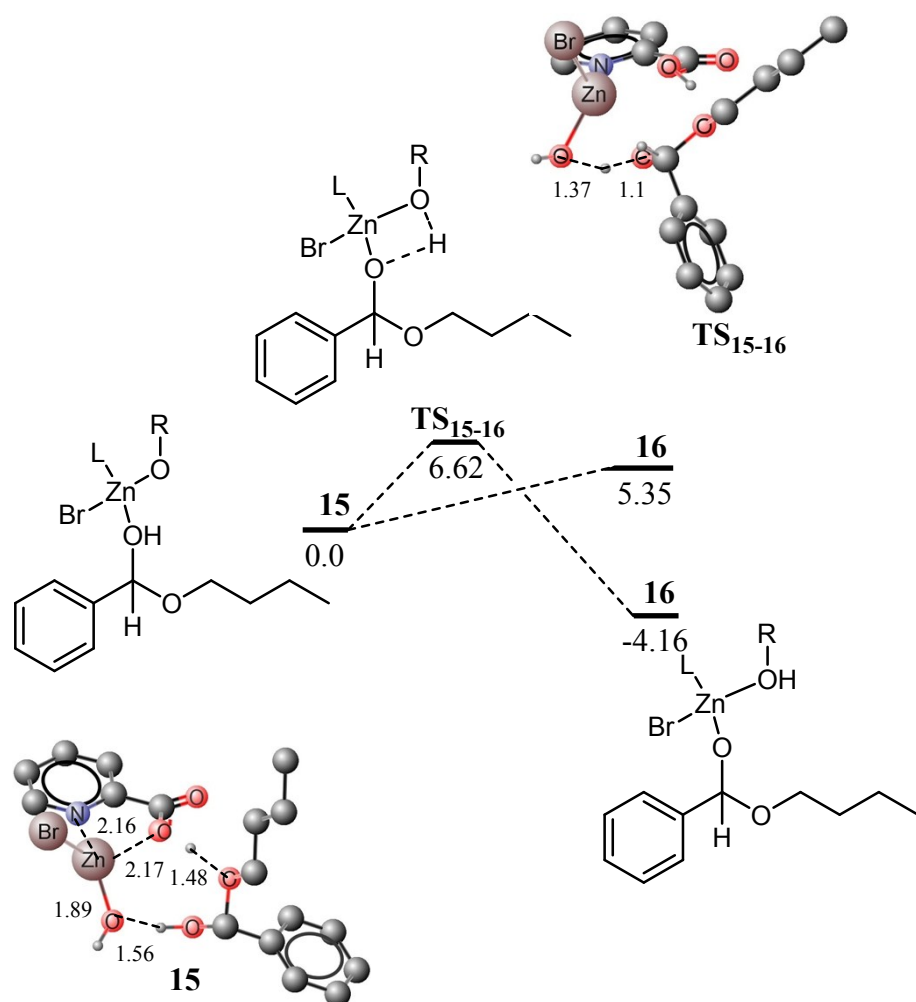

Figure S1. Energy profile for hydrogen shift between ligands, all energy values are relative to **15** at 0 kcal mol<sup>-1</sup>. All bond lengths are in Angstroms. Unnecessary hydrogen atoms are removed for clarity

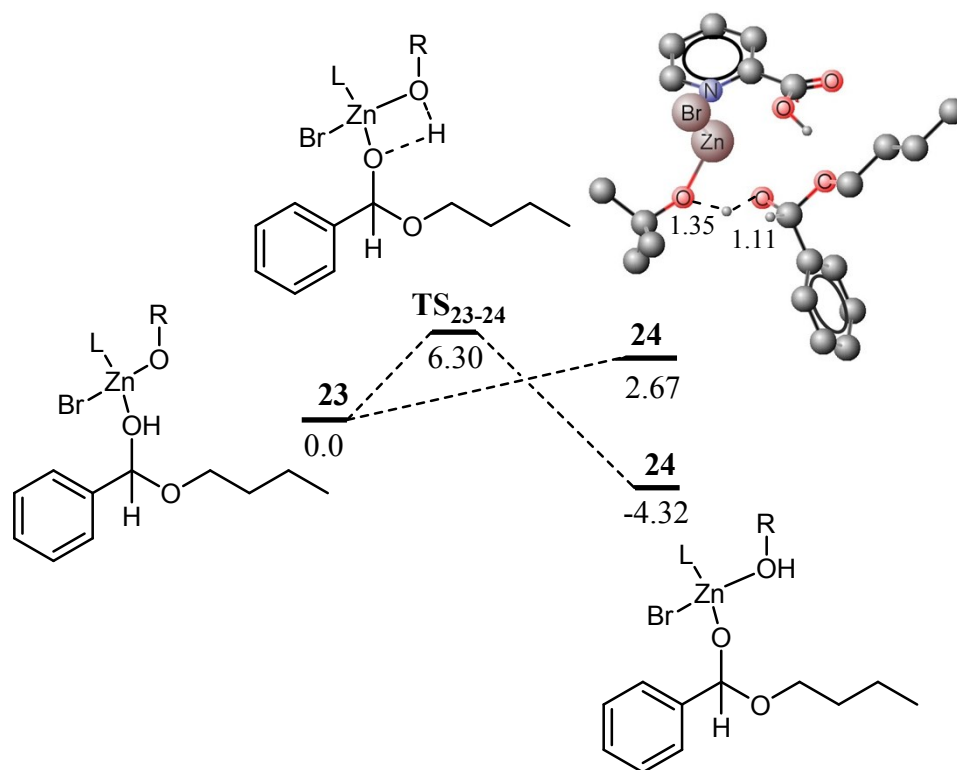

Figure S2. Energy profile for proton shift between oxy ligands, all energy values are relative to **12** at 0 kcal mol<sup>-1</sup>. All bond lengths are in Angstroms. Unnecessary hydrogen atoms are removed for clarity

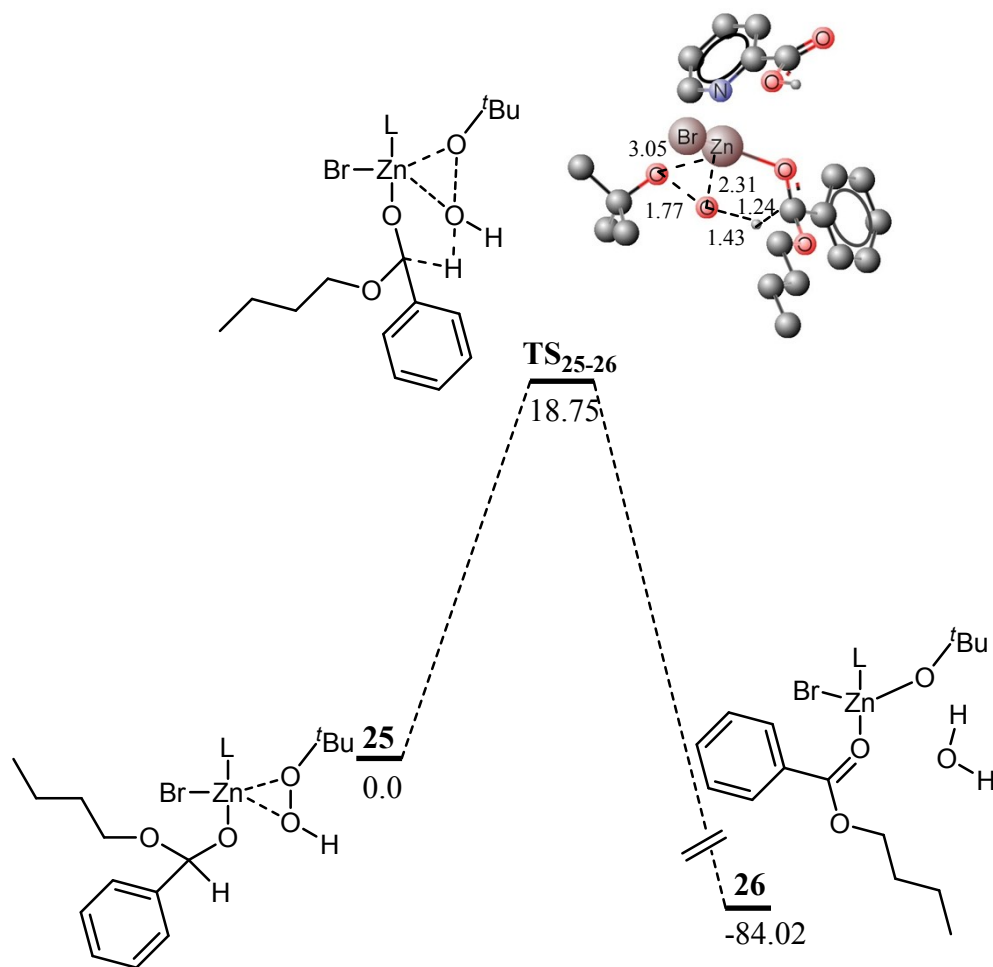

Figure S3, Energy profile for oxidation of hemiacetal to ester through TBHP coordinated to zinc catalyst, calculated at B3PW91/6-311G(d,p) with SDDALL pseudo potential for Zn and Br. All energy values are relative to **25** at 0 kcal mol<sup>-1</sup>. All bond lengths are in Angstroms. Unnecessary hydrogen atoms are removed for clarity

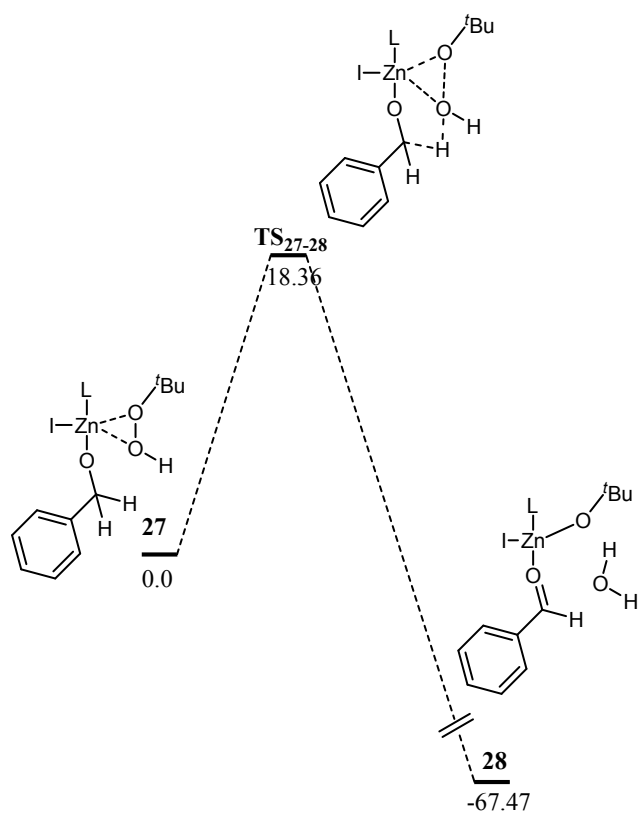

Figure S4. Energy profile for oxidation of alcohol to aldehyde through TBHP coordinated to zinc catalyst, calculated at B3PW91/6-311G(d,p) with SDDALL pseudo potential for Zn and Br. All energy values are relative to **27** at 0 kcal mol<sup>-1</sup>. Unnecessary hydrogen atoms are removed for clarity.

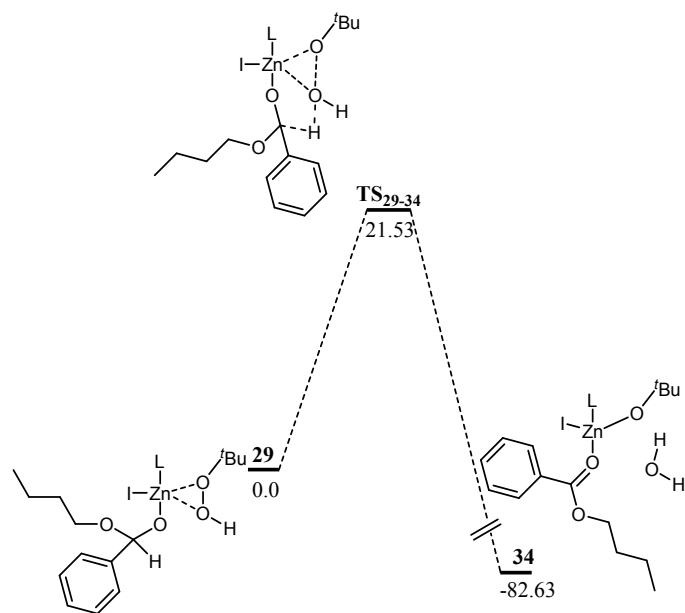

Figure S5. Energy profile for oxidation of hemiacetal to ester through TBHP coordinated to zinc catalyst, calculated at B3PW91/6-311G(d,p) with SDDALL pseudo potential for Zn and Br. All energy values are relative to **29** at 0 kcal mol<sup>-1</sup>.

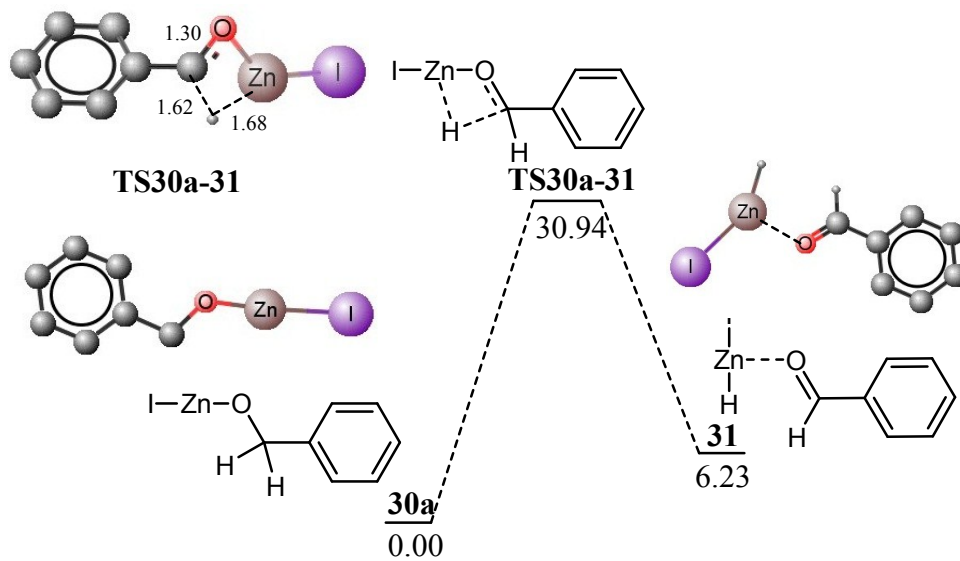

Figure S6. Energy profile for zinc mediated oxidation of alcohol to aldehyde through  $\beta$ -hydride elimination, calculated at B3PW91/6-31G\* with pseudo core potential for Zn and I. All energy values are zero point corrected and are in kcal mol<sup>-1</sup> relative to complex **30a** at 0 kcal mol<sup>-1</sup>. All bond lengths are in Angstroms. Unnecessary hydrogen atoms are removed for clarity

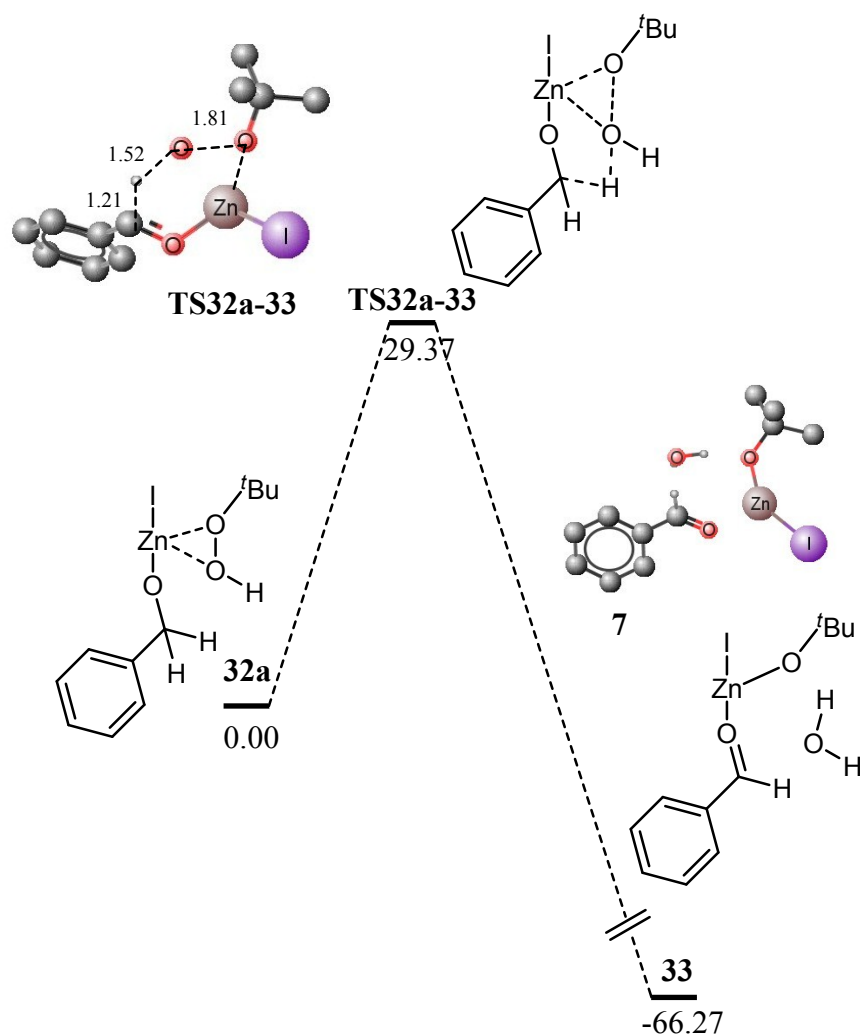

Figure S7. Energy profile for oxidation of alcohol to aldehyde through TBHP coordinated to zinc catalyst, calculated at B3PW91/6-31G\* with pseudo core potential for Zn and I. All energy values are zero point corrected and are in kcal mol<sup>-1</sup> relative to reactants at 0 kcal mol<sup>-1</sup>. All bond lengths are in Angstroms. Unnecessary hydrogen atoms are removed for clarity



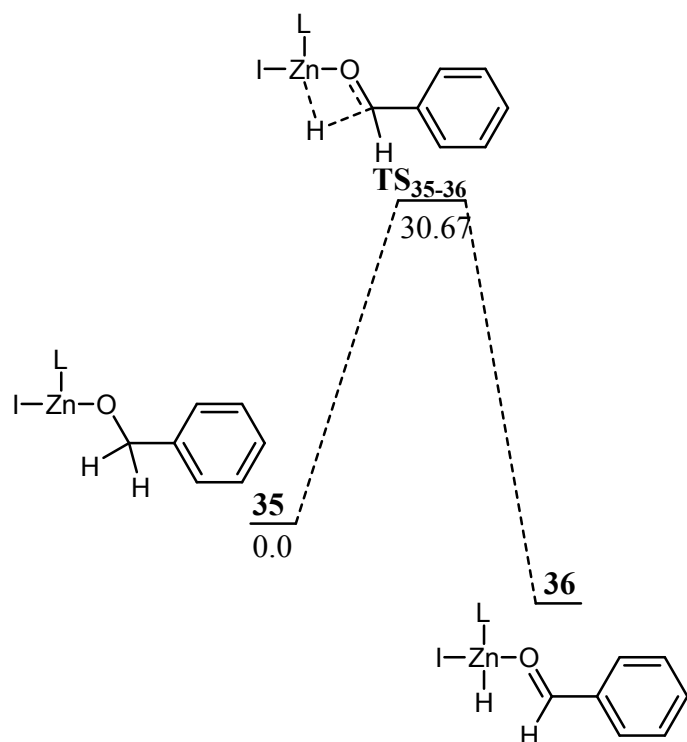

Figure S8. Energy profile for zinc mediated oxidation of alcohol to aldehyde through  $\beta$ -hydride elimination calculated at B3PW91/6-31G\* with pseudo core potential for Zn and I. All energy values are zero point corrected and are in kcal mol<sup>-1</sup> relative to complex **35** at 0 kcal mol<sup>-1</sup>.

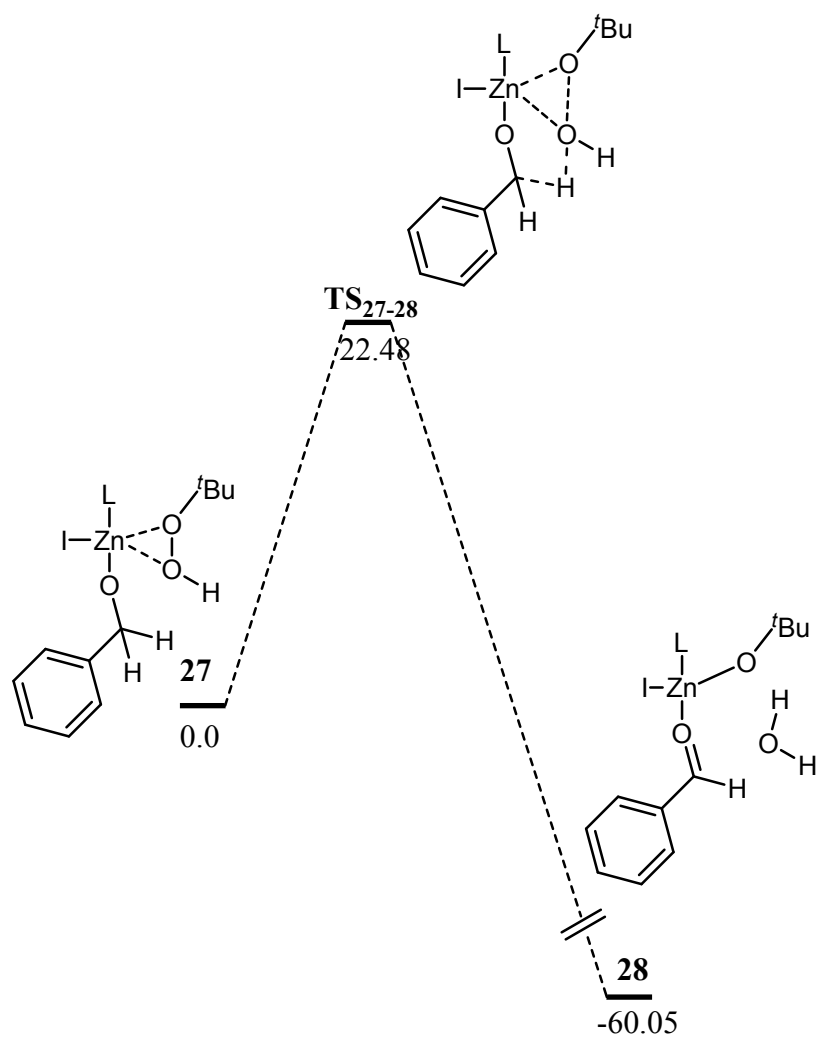

Figure S9. Energy profile for oxidation of alcohol to aldehyde through TBHP coordinated to zinc catalyst, calculated at B3PW91/6-31G\* with pseudo core potential for Zn and I. All energy values are zero point corrected, and are in kcal mol<sup>-1</sup> relative to **27** at 0 kcal mol<sup>-1</sup>.

## Comparison of geometries of **9** and **10**

The alcohol can coordinate to the metal (Zn) by replacing a halide to form complex **9** where a bidentate ligand is also attached to the metal centre. The mechanism and associated kinetic barrier for the exchange of a halide with alkoxide is beyond the scope of this study. Although the literature reveals up to 22 electron octahedral complexes of zinc[56], however, their catalytic role is not well established.

The complex **9** is an eighteen electron complex, and has a distorted tetrahedral geometry around the zinc atom. The ligand is bidentate for coordination with zinc. Br-Zn-O1, Br-Zn-N7 and Br-Zn-O8 (see Figure 2 for numbering) angles in **9** are 143.6, 105.9 and 114.6 degrees, respectively. The O1-Zn-O8 bond angle is 86.6 degrees. Zn-Br, Zn-O8, Zn-N7 and Zn-O1 bond distances are 2.32, 2.37, 2.16 and 1.85 Å, respectively. The complex **9** has another isomer **10** which is lower in energy than **9** by 19.01 kcal mol<sup>-1</sup>. A proton from carboxylic oxygen (O8) in **9** is shifted to O1 in complex **10**. The complex **10** is occasionally obtained during the optimization of complex **9**. The geometry of the complex **10** is also analyzed to explore the reasons for the higher stability over the complex **9**, and driving force for the proton shift. Probably, the higher acidity of carboxylic acid drives a proton shift to alkoxy ligand. Since in **10**, the neutral and anionic oxygens are interchanged, therefore, the angles and bond lengths are expected to change. The Br-Zn-O8 bond angle is 140.46°, which is considerably higher than 114.59° for Br-Zn-O8 in **9**. Br-Zn-O1 and Br-Zn-N7 bond angles in **10** are 109.59 and 122.38 degrees, respectively. The O1-Zn-O8 bond angle is 83.88°. The bond angles in complex **10** indicate a more distorted tetrahedral geometry of complex **10** compared to **9**. Zn-O8, Zn-O1 and Zn-N7 bond lengths are 1.96, 2.14 and 2.07 Å, respectively. The small bond distances indicate strong coordination of ligands on zinc in **10** compared to **9**, which probably illustrates the higher thermodynamic stability of the former. An additional hydrogen bonding between the OH of the alcohol and the oxygen of the acetate group imparts even higher stability to complex **10**. The O(1)-H .....O8 bond distance is 2.34 Å

Table S1. Total electronic, ZP and Gibbs free energies of optimized geometries

|                           | Total Electronic energies | Zero point corrected Energies | Gibbs Free energies |
|---------------------------|---------------------------|-------------------------------|---------------------|
| <b>9</b>                  | -1023.6413489             | -1023.413243                  | -1023.462231        |
| <b>10</b>                 | -1023.6707739             | -1023.441686                  | -1023.492534        |
| <b>TS9-11</b>             | -1023.5798714             | -1023.357761                  | -1023.411582        |
| <b>11</b>                 | -1023.625379              | -1023.403074                  | -1023.455791        |
| <b>12</b>                 | -1175.1889706             | -1174.932072                  | -1174.985423        |
| <b>13</b>                 | -1175.2180724             | -1174.959667                  | -1175.017396        |
| <b>TS12-14</b>            | -1175.1476074             | -1174.896484                  | -1174.949307        |
| <b>14</b>                 | -1175.3093404             | -1175.054830                  | -1175.110974        |
| <b>15</b>                 | -1332.5497996             | -1332.180171                  | -1332.241867        |
| <b>16</b>                 | -1332.5422416             | -1332.173023                  | -1332.233332        |
| <b>17</b>                 | -1407.6426232             | -1407.268107                  | -1407.329977        |
| <b>18</b>                 | -1407.6648356             | -1407.289249                  | -1407.350184        |
| <b>TS17-19</b>            | -1407.6024367             | -1407.233880                  | -1407.294924        |
| <b>19</b>                 | -1407.7798845             | -1407.907323                  | -1407.473656        |
| <b>20</b>                 | -1332.4252857             | -1332.058091                  | -1332.121050        |
| <b>21</b>                 | -1332.4392739             | -1332.070894                  | -1332.131913        |
| <b>TS20-22</b>            | -1332.3867642             | -1332.024696                  | -1332.084288        |
| <b>22</b>                 | -1332.5345974             | -1332.168898                  | -1332.230324        |
| <b>23</b>                 | -1489.7779104             | -1489.296913                  | -1489.362924        |
| <b>24</b>                 | -1489.7733672             | -1489.291911                  | -1489.358666        |
| <b>25</b>                 | -1564.8771697             | -1564.392550                  | -1564.460749        |
| <b>TS25-26</b>            | -1564.8414904             | -1564.361294                  | -1564.430863        |
| <b>26</b>                 | -1565.004212              | -1564.520052                  | -1564.594646        |
| <b>27</b>                 | -1330.464363              | -1330.097119                  | -1330.160833        |
| <b>TS27-28</b>            | -1330.4297375             | -1330.068036                  | -1330.131559        |
| <b>28</b>                 | -1330.5744538             | -1330.208389                  | -1330.268362        |
| <b>29</b>                 | -1562.9154081             | -1562.431315                  | -1562.502530        |
| <b>TS29-34</b>            | -1562.8799878             | -1562.400225                  | -1562.468208        |
| <b>30</b>                 | -584.8269366              | -584.703611                   | -584.745190         |
| <b>30a</b>                | -584.8224001              | -584.699319                   | -584.741208         |
| <b>TS<sub>30-31</sub></b> | -584.7699262              | -584.652660                   | -584.692463         |
| <b>31</b>                 | -584.8112696              | -584.693327                   | -584.735689         |
| <b>32</b>                 | -731.6230795              | -731.556785                   | -731.608266         |
| <b>32a</b>                | -731.8147498              | -731.548980                   | -731.602150         |
| <b>TS<sub>32-33</sub></b> | -731.7757906              | -731.515019                   | -731.567259         |
| <b>33</b>                 | -731.9138416              | -731.649548                   | -731.704889         |

### Cartesian coordinates of the optimized geometries

10

|    |             |             |             |
|----|-------------|-------------|-------------|
| C  | 2.14799100  | 0.30467800  | 1.73824300  |
| H  | 2.28218200  | 1.35805800  | 1.48016200  |
| O  | 0.74864300  | -0.04131600 | 1.58431600  |
| Zn | -0.64549400 | 0.89641700  | 0.26459400  |
| C  | 2.98138000  | -0.57287700 | 0.85182000  |
| C  | 3.65225400  | -0.03755800 | -0.24636500 |
| C  | 3.08776500  | -1.94120000 | 1.11469600  |
| C  | 4.42800200  | -0.85402000 | -1.06481600 |
| H  | 3.55864900  | 1.02122500  | -0.46589500 |
| C  | 3.85649400  | -2.75756900 | 0.29633900  |
| H  | 2.56324700  | -2.36680700 | 1.96503900  |
| C  | 4.53088700  | -2.21354100 | -0.79492200 |
| H  | 4.94778900  | -0.42624000 | -1.91554500 |
| H  | 3.93576500  | -3.81821200 | 0.51089300  |
| H  | 5.13557100  | -2.85064600 | -1.43195500 |
| H  | 2.41499600  | 0.15948500  | 2.78914200  |
| C  | -1.71594800 | -1.05683200 | -1.91137800 |
| C  | -2.63830100 | -1.98318500 | -2.37103800 |
| C  | -3.67316600 | -2.37330700 | -1.52502900 |
| C  | -3.75295900 | -1.82652700 | -0.25204000 |
| C  | -2.79381500 | -0.90147300 | 0.13854400  |
| H  | -0.89268600 | -0.71223200 | -2.52789000 |

|    |             |             |             |
|----|-------------|-------------|-------------|
| H  | -2.54530700 | -2.38603000 | -3.37231000 |
| H  | -4.41030300 | -3.09559600 | -1.85963000 |
| H  | -4.53063300 | -2.08414300 | 0.45591600  |
| N  | -1.79871800 | -0.53629200 | -0.68269500 |
| C  | -2.82851600 | -0.25995100 | 1.52930600  |
| O  | -1.90719000 | 0.62311000  | 1.74173700  |
| H  | 0.26777900  | 0.06237300  | 2.41545400  |
| O  | -3.68828100 | -0.62766800 | 2.30357600  |
| Br | 0.40888600  | 2.60592700  | -0.89313000 |

## 9

|    |             |             |             |
|----|-------------|-------------|-------------|
| C  | -1.98964900 | -0.46192800 | 2.02698000  |
| H  | -2.35170200 | -1.49949000 | 1.93910400  |
| O  | -0.60060600 | -0.36282600 | 1.88650600  |
| Zn | 0.24628600  | -0.97298500 | 0.36471200  |
| C  | -2.75809900 | 0.39514900  | 1.04047900  |
| C  | -3.85156000 | -0.10491900 | 0.33368400  |
| C  | -2.37295400 | 1.72178300  | 0.82250700  |
| C  | -4.55141700 | 0.69835100  | -0.56388200 |
| H  | -4.15515700 | -1.13744900 | 0.48338700  |
| C  | -3.06887500 | 2.52723200  | -0.07095900 |
| H  | -1.51919200 | 2.11156500  | 1.36790200  |
| C  | -4.16277300 | 2.01741500  | -0.76815400 |
| H  | -5.39730000 | 0.29018800  | -1.10808800 |

|    |             |             |             |
|----|-------------|-------------|-------------|
| H  | -2.76489300 | 3.55918500  | -0.22006300 |
| H  | -4.70744400 | 2.64567300  | -1.46571200 |
| H  | -2.24942900 | -0.13116300 | 3.04575500  |
| C  | 0.91307600  | 1.20690700  | -1.68015000 |
| C  | 1.52173900  | 2.32975000  | -2.22938000 |
| C  | 2.59750100  | 2.90315600  | -1.56511000 |
| C  | 3.03647300  | 2.33226300  | -0.37667300 |
| C  | 2.37733100  | 1.20580500  | 0.09485000  |
| H  | 0.06817600  | 0.72605700  | -2.16126700 |
| H  | 1.14939500  | 2.74090400  | -3.15984400 |
| H  | 3.09082300  | 3.78137700  | -1.96643000 |
| H  | 3.86969400  | 2.73001200  | 0.18888300  |
| N  | 1.33195200  | 0.65950000  | -0.53948900 |
| C  | 2.84112300  | 0.56553700  | 1.36321900  |
| O  | 2.28037100  | -0.64838900 | 1.53848100  |
| H  | 2.48975500  | -0.97162200 | 2.42607000  |
| O  | 3.62514700  | 1.05757700  | 2.12451100  |
| Br | 0.28954900  | -2.70463100 | -1.18557400 |

**TS<sub>9-11</sub>**

|    |             |             |             |
|----|-------------|-------------|-------------|
| C  | -1.53691800 | -1.63038900 | 0.57798400  |
| H  | -0.84186200 | -1.28630800 | -0.96976900 |
| O  | -0.70402400 | -1.24388800 | 1.45504700  |
| Zn | 0.61971800  | -0.94050700 | -0.18473900 |
| C  | -2.83455100 | -0.92686600 | 0.38060700  |
| C  | -3.80105500 | -1.45088100 | -0.48028900 |

|    |             |             |             |
|----|-------------|-------------|-------------|
| C  | -3.10977200 | 0.23182600  | 1.10709100  |
| C  | -5.02514100 | -0.81321700 | -0.62710900 |
| H  | -3.58437900 | -2.35709500 | -1.03930900 |
| C  | -4.33757400 | 0.86671600  | 0.96410700  |
| H  | -2.35482100 | 0.60192900  | 1.79188700  |
| C  | -5.29406700 | 0.34851400  | 0.09472200  |
| H  | -5.77402000 | -1.22198000 | -1.29737600 |
| H  | -4.55471700 | 1.76260400  | 1.53686400  |
| H  | -6.25333100 | 0.84400600  | -0.01474600 |
| H  | -1.55656300 | -2.68753000 | 0.26805300  |
| C  | -0.14533300 | 1.58705200  | -1.54748100 |
| C  | -0.18110700 | 2.91463100  | -1.95490800 |
| C  | 0.57735700  | 3.84827500  | -1.26312400 |
| C  | 1.33768400  | 3.42299400  | -0.18169700 |
| C  | 1.30904200  | 2.07996300  | 0.16800500  |
| H  | -0.71474600 | 0.81567300  | -2.05544400 |
| H  | -0.79318700 | 3.19835100  | -2.80244600 |
| H  | 0.57771900  | 4.89157400  | -1.55875600 |
| H  | 1.95236200  | 4.09723300  | 0.40116700  |
| N  | 0.58552700  | 1.17418400  | -0.50818800 |
| C  | 2.12199400  | 1.63680300  | 1.34656700  |
| O  | 1.85777600  | 0.37296200  | 1.67533700  |
| H  | 2.44811700  | 0.08540000  | 2.38543700  |
| O  | 2.90103200  | 2.35130600  | 1.91854400  |
| Br | 2.62393100  | -2.09381500 | -0.55555300 |



**11**

|    |             |             |             |
|----|-------------|-------------|-------------|
| C  | -2.43101600 | -0.53642200 | 0.12991700  |
| H  | 1.57599900  | 1.27563100  | 2.73642600  |
| O  | -1.87079000 | -1.47049100 | 0.69282500  |
| Zn | 1.42721000  | 1.00969500  | 1.22353100  |
| C  | -3.87994100 | -0.43761200 | -0.02719200 |
| C  | -4.41308800 | 0.68591800  | -0.66736800 |
| C  | -4.72711000 | -1.44394300 | 0.45375400  |
| C  | -5.78746800 | 0.80434900  | -0.82632800 |
| H  | -3.74522300 | 1.46032100  | -1.03289900 |
| C  | -6.09667700 | -1.32198000 | 0.29168500  |
| H  | -4.28865000 | -2.30492800 | 0.94586200  |
| C  | -6.62526500 | -0.19878600 | -0.34741200 |
| H  | -6.20578300 | 1.67423800  | -1.32027600 |
| H  | -6.75970300 | -2.09701900 | 0.66041500  |
| H  | -7.69944100 | -0.10704400 | -0.47130600 |
| H  | -1.83547800 | 0.29466200  | -0.28767300 |
| C  | 4.27309000  | 0.43652300  | 0.10983200  |
| C  | 5.29398100  | -0.24488800 | -0.54048800 |
| C  | 5.03645700  | -1.51382500 | -1.04395200 |
| C  | 3.76940300  | -2.05693100 | -0.87920900 |
| C  | 2.80937700  | -1.30824900 | -0.21100100 |
| H  | 4.42808700  | 1.43194300  | 0.51303600  |
| H  | 6.26727200  | 0.21851400  | -0.64890500 |
| H  | 5.81068100  | -2.07120200 | -1.55963900 |
| H  | 3.49920700  | -3.03671900 | -1.25250600 |

|    |             |             |             |
|----|-------------|-------------|-------------|
| N  | 3.05660900  | -0.08481300 | 0.27179800  |
| C  | 1.42931500  | -1.87359200 | -0.03575400 |
| O  | 0.66842700  | -1.10214600 | 0.74132300  |
| H  | -0.31193200 | -1.37519800 | 0.73706200  |
| O  | 1.07883400  | -2.90462500 | -0.54498900 |
| Br | 0.40383700  | 2.08041100  | -0.66229400 |

## 12

|    |             |             |             |
|----|-------------|-------------|-------------|
| Zn | -0.26952600 | 0.56192800  | -0.47777800 |
| O  | 0.71814400  | -0.34229600 | -1.78367400 |
| C  | 2.07414700  | -0.07801500 | -1.98042600 |
| H  | 2.29794000  | 1.00089600  | -2.03687200 |
| C  | 2.96683700  | -0.69150200 | -0.91716500 |
| C  | 2.77951500  | -2.02520800 | -0.53677500 |
| C  | 3.97112500  | 0.04635800  | -0.28372200 |
| C  | 3.58448700  | -2.60747600 | 0.43379800  |
| H  | 1.98446700  | -2.59200400 | -1.00991500 |
| C  | 4.77786400  | -0.53482900 | 0.69626600  |
| H  | 4.12507600  | 1.08530500  | -0.56392300 |
| C  | 4.58756200  | -1.86415800 | 1.05460700  |
| H  | 3.42991900  | -3.64521400 | 0.71241300  |
| H  | 5.55028800  | 0.05500600  | 1.17930400  |
| H  | 5.21198900  | -2.31856200 | 1.81664800  |
| O  | 1.08697300  | 0.21560400  | 1.35410400  |
| H  | 2.01886100  | 0.14269300  | 1.07875100  |
| O  | 1.09230700  | 1.26803100  | 2.32860000  |

|    |             |             |             |
|----|-------------|-------------|-------------|
| C  | -1.84218200 | -0.46541300 | 1.91749700  |
| C  | -2.79306100 | -1.17538800 | 2.64137800  |
| C  | -3.72677200 | -1.94284300 | 1.95904700  |
| C  | -3.68622200 | -1.97028200 | 0.57081300  |
| C  | -2.71903700 | -1.21572500 | -0.07662700 |
| H  | -1.08333100 | 0.13129300  | 2.41124500  |
| H  | -2.78681700 | -1.12414500 | 3.72339700  |
| H  | -4.47574200 | -2.51244200 | 2.49803000  |
| H  | -4.37928300 | -2.55461800 | -0.02128200 |
| N  | -1.80704200 | -0.48442700 | 0.58236300  |
| C  | -2.65371700 | -1.23052300 | -1.57179000 |
| O  | -1.98896000 | -0.15846200 | -2.02897000 |
| H  | -1.68706500 | -0.30775500 | -2.93657300 |
| O  | -3.13538200 | -2.08756800 | -2.25856600 |
| H  | 2.37510400  | -0.50197100 | -2.95313700 |
| Br | -0.53366000 | 2.88664400  | 0.00643800  |
| H  | 0.72382100  | 2.00968900  | 1.80003800  |

### 13

|    |             |            |             |
|----|-------------|------------|-------------|
| Zn | -0.55940100 | 0.05837700 | 0.45078800  |
| O  | 0.89047800  | 1.73009600 | 0.37285700  |
| C  | 2.18317500  | 1.72520300 | 0.99636900  |
| H  | 2.15043100  | 1.16036600 | 1.93295900  |
| C  | 3.17613400  | 1.11048800 | 0.04889700  |
| C  | 3.24001600  | 1.54166400 | -1.28147300 |

|   |             |             |             |
|---|-------------|-------------|-------------|
| C | 4.05300500  | 0.11601000  | 0.48198500  |
| C | 4.16747600  | 0.98667200  | -2.15775600 |
| H | 2.55941000  | 2.31476300  | -1.62394700 |
| C | 4.98849000  | -0.42922900 | -0.39233900 |
| H | 3.99428500  | -0.24052400 | 1.50534100  |
| C | 5.04648700  | 0.00267500  | -1.71284500 |
| H | 4.20726000  | 1.32726900  | -3.18705000 |
| H | 5.66370600  | -1.20308800 | -0.04318200 |
| H | 5.77035300  | -0.42894100 | -2.39572400 |
| O | 0.61576000  | -0.53143000 | -1.39214300 |
| H | 1.52203400  | -0.17746800 | -1.37106200 |
| O | 0.80186700  | -1.94962000 | -1.45724400 |
| C | -2.63627000 | -1.32715200 | -1.40864900 |
| C | -3.89973600 | -1.44642000 | -1.96647800 |
| C | -4.86253700 | -0.49020400 | -1.65611800 |
| C | -4.53101100 | 0.55584500  | -0.80646800 |
| C | -3.24552100 | 0.60846800  | -0.28391300 |
| H | -1.84176100 | -2.03411400 | -1.62263600 |
| H | -4.11920600 | -2.27351500 | -2.63081400 |
| H | -5.85998300 | -0.56062900 | -2.07717900 |
| H | -5.22710500 | 1.33800800  | -0.53080400 |
| N | -2.32819100 | -0.32151800 | -0.58283100 |
| C | -2.80984500 | 1.74678900  | 0.63923100  |
| O | -1.59529300 | 1.64417000  | 1.07071000  |
| H | 0.27018400  | 2.31966200  | 0.83295500  |
| O | -3.60513600 | 2.63305300  | 0.87683700  |

|    |            |             |             |
|----|------------|-------------|-------------|
| H  | 2.46501500 | 2.76067000  | 1.22007400  |
| Br | 0.41766700 | -1.65816100 | 1.77941500  |
| H  | 0.82582100 | -2.18250900 | -0.50309200 |

**TS<sub>12-14</sub>**

|    |             |             |             |
|----|-------------|-------------|-------------|
| Zn | 0.74986500  | -0.74842200 | -0.05349900 |
| O  | -0.97973700 | -0.27272400 | -0.82107200 |
| C  | -2.00945400 | -1.00839000 | -0.41601900 |
| H  | -1.70219100 | -1.46731000 | 0.69195500  |
| C  | -3.31622100 | -0.31326100 | -0.20680100 |
| C  | -3.38776300 | 1.08106300  | -0.20426500 |
| C  | -4.48335200 | -1.05611600 | 0.00071400  |
| C  | -4.60428400 | 1.72019700  | 0.00259500  |
| H  | -2.47949100 | 1.64388700  | -0.38636500 |
| C  | -5.69763400 | -0.41703000 | 0.21140700  |
| H  | -4.43553000 | -2.14196500 | -0.00652200 |
| C  | -5.76113300 | 0.97478200  | 0.21440500  |
| H  | -4.65332600 | 2.80449300  | -0.00686500 |
| H  | -6.59768700 | -1.00248300 | 0.36843200  |
| H  | -6.71027500 | 1.47536600  | 0.37542100  |
| O  | -0.62553500 | -1.52758100 | 1.59385900  |
| H  | -1.02907100 | -0.93128500 | 2.23932300  |
| O  | 0.90306700  | -1.37076300 | 2.52772300  |
| C  | 1.88916200  | 1.35186800  | 1.80334000  |
| C  | 2.32383100  | 2.59481700  | 2.25072700  |
| C  | 2.41976700  | 3.64255100  | 1.34714700  |

|    |             |             |             |
|----|-------------|-------------|-------------|
| C  | 2.09309200  | 3.40952500  | 0.01704300  |
| C  | 1.69004900  | 2.13587400  | -0.35607900 |
| H  | 1.77211700  | 0.49538500  | 2.46201100  |
| H  | 2.57403900  | 2.72606600  | 3.29662600  |
| H  | 2.74677300  | 4.62543000  | 1.66819400  |
| H  | 2.14692000  | 4.18117800  | -0.74048300 |
| N  | 1.57609200  | 1.12642300  | 0.52327000  |
| C  | 1.38120400  | 1.88148400  | -1.79896700 |
| O  | 1.40590300  | 0.57339600  | -2.07787900 |
| H  | 1.08161900  | 0.42828700  | -2.97753900 |
| O  | 1.17138800  | 2.75049100  | -2.60043500 |
| H  | -2.13315700 | -1.98204100 | -0.92834700 |
| Br | 2.12641500  | -2.60737700 | -0.47257900 |
| H  | 1.24184400  | -2.23586600 | 2.25747400  |

#### 14

|    |             |             |             |
|----|-------------|-------------|-------------|
| Zn | -0.63118700 | -0.45327100 | -0.79578800 |
| O  | 1.23361700  | -0.39814000 | 0.22559600  |
| C  | 2.17199000  | 0.25894900  | -0.22727600 |
| H  | 1.54504200  | 3.10497500  | -2.49694900 |
| C  | 3.52104400  | 0.22267600  | 0.32412100  |
| C  | 3.84896800  | -0.56588700 | 1.43446500  |
| C  | 4.49856400  | 1.00374200  | -0.30421500 |
| C  | 5.14776700  | -0.56441400 | 1.91361800  |
| H  | 3.07536100  | -1.16789000 | 1.89785700  |
| C  | 5.79990500  | 0.99946600  | 0.18068200  |

|    |             |             |             |
|----|-------------|-------------|-------------|
| H  | 4.21990500  | 1.59736400  | -1.17057600 |
| C  | 6.12058100  | 0.21811400  | 1.28719100  |
| H  | 5.41289000  | -1.17174900 | 2.77226400  |
| H  | 6.56340000  | 1.59942100  | -0.30201700 |
| H  | 7.13755900  | 0.21371800  | 1.66605400  |
| O  | 1.89418300  | 2.25050300  | -2.75947000 |
| H  | 1.10796900  | 1.65068600  | -2.71140600 |
| O  | -0.20023400 | 0.62063900  | -2.32906800 |
| C  | -2.29537600 | 1.98780400  | -0.75349600 |
| C  | -3.26582700 | 2.93899600  | -0.45944800 |
| C  | -3.93216200 | 2.86778400  | 0.75566600  |
| C  | -3.60042900 | 1.85008900  | 1.64071800  |
| C  | -2.60801600 | 0.94870000  | 1.27940100  |
| H  | -1.74273800 | 1.95955500  | -1.69083900 |
| H  | -3.49335800 | 3.71239200  | -1.18345700 |
| H  | -4.70125200 | 3.58851900  | 1.01119800  |
| H  | -4.08778000 | 1.72977700  | 2.59997000  |
| N  | -1.96886300 | 1.01186400  | 0.10167400  |
| C  | -2.26191400 | -0.14475400 | 2.24236300  |
| O  | -1.13103200 | -0.76515900 | 1.90290700  |
| H  | -1.01974200 | -1.54364600 | 2.46564900  |
| O  | -2.92773600 | -0.41168200 | 3.20792700  |
| H  | 2.02207200  | 0.92600900  | -1.08955300 |
| Br | -1.50711700 | -2.63695100 | -0.95289900 |
| H  | -0.39356000 | 0.11235600  | -3.12068800 |

**15**

|    |             |             |             |
|----|-------------|-------------|-------------|
| H  | 0.64389400  | -1.06769000 | 1.74621000  |
| O  | -0.73032300 | -0.51184900 | 2.27884800  |
| O  | 1.47798700  | -1.39188700 | 1.28633000  |
| Zn | -1.91316200 | 0.20885800  | 1.01794500  |
| C  | 2.33626600  | -0.35588900 | 1.10175300  |
| H  | 2.32417300  | 0.36700200  | 1.93400500  |
| C  | 3.73782300  | -0.85652900 | 0.85540500  |
| C  | 4.78980900  | -0.46641400 | 1.67825200  |
| C  | 3.97983300  | -1.73984600 | -0.19831400 |
| C  | 6.07663000  | -0.95183800 | 1.45643600  |
| H  | 4.60319400  | 0.21619400  | 2.50282000  |
| C  | 5.26202800  | -2.22247600 | -0.42093200 |
| H  | 3.15508700  | -2.04330200 | -0.83357300 |
| C  | 6.31360600  | -1.82973300 | 0.40583200  |
| H  | 6.89064400  | -0.64446300 | 2.10481200  |
| H  | 5.44492100  | -2.90988900 | -1.24054800 |
| H  | 7.31475900  | -2.20958100 | 0.22970100  |
| C  | 2.50515200  | 1.66614200  | -0.27884600 |
| H  | 2.32365600  | 2.30098400  | 0.60053200  |
| H  | 3.58710100  | 1.51394700  | -0.37028200 |
| C  | 1.95318400  | 2.31512600  | -1.53375300 |
| H  | 2.09445200  | 1.62678000  | -2.37476700 |
| H  | 0.87293900  | 2.46456800  | -1.42195600 |
| C  | 2.62484000  | 3.65360300  | -1.83663200 |
| H  | 2.49625800  | 4.32812200  | -0.98110500 |



|    |             |             |             |
|----|-------------|-------------|-------------|
| C  | 2.07434200  | 4.31911300  | -3.09408300 |
| H  | 2.57197900  | 5.27293100  | -3.28938200 |
| H  | 2.21774900  | 3.68308100  | -3.97326600 |
| H  | 1.00208900  | 4.51678900  | -2.99970700 |
| H  | 3.70563100  | 3.50115500  | -1.94607200 |
| O  | 1.88001500  | 0.39755500  | -0.08171900 |
| C  | -2.13788200 | -1.66628700 | -1.28767300 |
| C  | -4.07722900 | -1.70236700 | -0.04097200 |
| C  | -4.65122200 | -2.63950000 | -0.89003700 |
| C  | -3.91679500 | -3.09850700 | -1.97658400 |
| C  | -2.63572000 | -2.60355200 | -2.18165700 |
| H  | -4.61307200 | -1.30632200 | 0.81491100  |
| H  | -5.65552300 | -2.99641400 | -0.69659200 |
| H  | -4.33769900 | -3.83091600 | -2.65659000 |
| H  | -2.01091800 | -2.91940600 | -3.00755800 |
| N  | -2.84400800 | -1.23208600 | -0.23527300 |
| C  | -0.75380900 | -1.11230500 | -1.47860500 |
| O  | 0.01135800  | -1.54642200 | -2.29609000 |
| O  | -0.50795800 | -0.09985200 | -0.64624900 |
| H  | 0.49960700  | 0.10403600  | -0.51116900 |
| Br | -3.28394800 | 2.10063600  | 1.09442400  |
| H  | -0.82359800 | -0.16383900 | 3.16679000  |

**16**

|   |             |             |             |
|---|-------------|-------------|-------------|
| H | -0.75179500 | -2.60345000 | -0.87923000 |
| O | -1.71559300 | -2.66846400 | -0.73572800 |

|    |             |             |             |
|----|-------------|-------------|-------------|
| O  | 0.38868900  | -1.16441800 | -0.32881600 |
| Zn | -1.35680800 | -0.71407000 | 0.40546500  |
| C  | 1.58498300  | -0.86248900 | 0.20128900  |
| H  | 1.67342800  | -1.10340700 | 1.27756700  |
| C  | 2.72386600  | -1.50933300 | -0.55886100 |
| C  | 3.63231500  | -2.34025300 | 0.09022500  |
| C  | 2.84912000  | -1.30099000 | -1.93373700 |
| C  | 4.65808900  | -2.96005400 | -0.62089700 |
| H  | 3.53426100  | -2.50953000 | 1.15926600  |
| C  | 3.87322800  | -1.91296100 | -2.64305000 |
| H  | 2.13525000  | -0.65665500 | -2.43480000 |
| C  | 4.78024500  | -2.74568700 | -1.98821700 |
| H  | 5.35893900  | -3.60913600 | -0.10589400 |
| H  | 3.96709800  | -1.74466900 | -3.71126200 |
| H  | 5.57857600  | -3.22508800 | -2.54545900 |
| C  | 2.84668100  | 1.14106300  | 0.89859300  |
| H  | 2.70495400  | 0.88514300  | 1.95902800  |
| H  | 3.77411600  | 0.66575800  | 0.55836200  |
| C  | 2.92031800  | 2.64457600  | 0.71125400  |
| H  | 3.01088500  | 2.86041800  | -0.35893700 |
| H  | 1.97939200  | 3.09953200  | 1.04184200  |
| C  | 4.08740600  | 3.26993500  | 1.47352400  |
| H  | 3.99733700  | 3.03043300  | 2.54040400  |
| C  | 4.16382100  | 4.78337400  | 1.29806300  |
| H  | 5.00746000  | 5.20621200  | 1.85050200  |
| H  | 4.28617300  | 5.05354100  | 0.24452600  |

|    |             |             |             |
|----|-------------|-------------|-------------|
| H  | 3.25215400  | 5.26965200  | 1.65903300  |
| H  | 5.02703800  | 2.81448900  | 1.13727400  |
| O  | 1.75863800  | 0.62151200  | 0.13275300  |
| C  | -2.44271700 | 1.59245400  | -1.15701200 |
| C  | -3.89022500 | -0.20415000 | -1.20585800 |
| C  | -4.80885900 | 0.50886600  | -1.96455300 |
| C  | -4.50829800 | 1.81570000  | -2.32949700 |
| C  | -3.29857700 | 2.36637200  | -1.92775500 |
| H  | -4.06511700 | -1.23147300 | -0.90845900 |
| H  | -5.73869700 | 0.03995300  | -2.26283900 |
| H  | -5.20545900 | 2.39605100  | -2.92392700 |
| H  | -2.99577800 | 3.37090100  | -2.19530600 |
| N  | -2.73519800 | 0.33201300  | -0.80654700 |
| C  | -1.10288700 | 2.12989100  | -0.73398600 |
| O  | -0.59635000 | 3.08511600  | -1.26086900 |
| O  | -0.58047100 | 1.41312500  | 0.25519300  |
| H  | 0.45135600  | 1.27503400  | 0.21318600  |
| Br | -2.22170800 | -1.30521700 | 2.51491700  |
| H  | -1.82153000 | -3.29596600 | -0.01251100 |

## 17

|    |             |             |             |
|----|-------------|-------------|-------------|
| Zn | 0.88527100  | -0.02535400 | 0.51915300  |
| O  | -0.87197700 | -0.06341300 | -0.10966100 |
| C  | -1.84537200 | 0.86069700  | 0.20611400  |
| H  | -1.91248200 | 1.01420800  | 1.30318300  |
| C  | -1.59111500 | 2.20248700  | -0.45874000 |

|   |             |             |             |
|---|-------------|-------------|-------------|
| C | -1.75747100 | 2.34435100  | -1.83836400 |
| C | -1.11622300 | 3.28651800  | 0.28124000  |
| C | -1.45177900 | 3.54650100  | -2.46353700 |
| H | -2.13663700 | 1.50166500  | -2.40450000 |
| C | -0.79819800 | 4.49247700  | -0.34780000 |
| H | -0.99729300 | 3.18833600  | 1.35718100  |
| C | -0.96519600 | 4.62283900  | -1.72248900 |
| H | -1.59037400 | 3.64797700  | -3.53534900 |
| H | -0.42760900 | 5.32672800  | 0.23893600  |
| H | -0.72246800 | 5.55909800  | -2.21405100 |
| O | 1.56920200  | 1.86086400  | -0.58515400 |
| H | 0.85577700  | 2.52411600  | -0.53022000 |
| O | 2.70425100  | 2.52682600  | -0.01721300 |
| C | -3.54903300 | -0.77335900 | 0.35783000  |
| H | -2.87429700 | -1.59826500 | 0.09662200  |
| H | -3.53093100 | -0.66171100 | 1.45582300  |
| C | -4.95959100 | -1.06855900 | -0.11546300 |
| H | -5.60125700 | -0.21605200 | 0.13564600  |
| H | -4.95151300 | -1.14127300 | -1.20929400 |
| C | -5.52949500 | -2.34998500 | 0.48797600  |
| H | -4.87081500 | -3.19255600 | 0.24161000  |
| H | -5.52462700 | -2.27112100 | 1.58263400  |
| C | -6.94515800 | -2.65764800 | 0.00941700  |
| H | -7.32887700 | -3.57908800 | 0.45682400  |
| H | -7.63481900 | -1.84878600 | 0.27106900  |
| H | -6.97679000 | -2.77784600 | -1.07823400 |

|    |             |             |             |
|----|-------------|-------------|-------------|
| O  | -3.10889300 | 0.42563400  | -0.24994300 |
| C  | 3.15036800  | -0.58330900 | -1.41663300 |
| C  | 3.96188200  | -1.27406200 | -2.30926400 |
| C  | 3.76681000  | -2.63609500 | -2.48433600 |
| C  | 2.77409300  | -3.26840200 | -1.74723900 |
| C  | 2.01932800  | -2.51103800 | -0.86313300 |
| H  | 3.26431300  | 0.48265000  | -1.26094800 |
| H  | 4.72752100  | -0.73764000 | -2.85650800 |
| H  | 4.37837000  | -3.19977900 | -3.18006100 |
| H  | 2.56869100  | -4.32791800 | -1.83265400 |
| N  | 2.19262400  | -1.18868800 | -0.70767200 |
| C  | 0.97249600  | -3.20301900 | -0.04883200 |
| O  | 0.54144200  | -2.42914600 | 0.95778500  |
| H  | -0.20765900 | -2.85779900 | 1.39421200  |
| O  | 0.58614000  | -4.31939400 | -0.26042300 |
| H  | 2.68188300  | 2.18305000  | 0.90227600  |
| Br | 1.96359900  | 0.62486000  | 2.54289500  |

## 18

|    |             |             |             |
|----|-------------|-------------|-------------|
| Zn | 0.07399800  | -1.10550500 | -0.47533500 |
| O  | -1.03445900 | 0.61126100  | -1.50822500 |
| C  | -1.47820500 | 1.84982600  | -0.96206800 |
| H  | -1.64298000 | 2.54078400  | -1.80427500 |
| C  | -2.77445400 | 1.59649900  | -0.22566000 |
| C  | -3.09811000 | 2.34470800  | 0.90915400  |
| C  | -3.67757000 | 0.64226500  | -0.70175000 |
| C  | -4.30967700 | 2.13473500  | 1.56188300  |

|   |             |             |             |
|---|-------------|-------------|-------------|
| H | -2.39436500 | 3.08249300  | 1.27512100  |
| C | -4.88671100 | 0.43977300  | -0.04715100 |
| H | -3.42078700 | 0.05072800  | -1.57223900 |
| C | -5.20608800 | 1.18520500  | 1.08413600  |
| H | -4.55116700 | 2.71616700  | 2.44538100  |
| H | -5.57792900 | -0.30854000 | -0.41968000 |
| H | -6.14956700 | 1.02245100  | 1.59437800  |
| O | -0.81696100 | -0.34261800 | 1.42762000  |
| H | -1.55491600 | 0.28375000  | 1.32691900  |
| O | -1.38196400 | -1.41168000 | 2.19493800  |
| C | 0.56955600  | 3.02761500  | -0.71388800 |
| H | 1.12297600  | 2.29631400  | -1.31577300 |
| H | 0.20313200  | 3.81946300  | -1.38359400 |
| C | 1.47243300  | 3.60544900  | 0.35576500  |
| H | 0.91025000  | 4.34317300  | 0.94025600  |
| H | 1.75290400  | 2.80313700  | 1.04722700  |
| C | 2.72865100  | 4.24493800  | -0.23447400 |
| H | 3.27452600  | 3.49525500  | -0.81883500 |
| H | 2.43961000  | 5.03307000  | -0.94099500 |
| C | 3.64826600  | 4.83224200  | 0.83145600  |
| H | 4.53874900  | 5.28121500  | 0.38337000  |
| H | 3.14001500  | 5.60906000  | 1.41187300  |
| H | 3.98287800  | 4.06110400  | 1.53250800  |
| O | -0.55097900 | 2.39749000  | -0.08232700 |
| C | 2.03621800  | -2.15080100 | 1.72915300  |
| C | 3.30424300  | -2.38559100 | 2.23996600  |

|    |             |             |             |
|----|-------------|-------------|-------------|
| C  | 4.40924900  | -1.92945000 | 1.52704700  |
| C  | 4.21241000  | -1.24591600 | 0.33508500  |
| C  | 2.91246500  | -1.05389700 | -0.11387500 |
| H  | 1.13754700  | -2.46907200 | 2.24650400  |
| H  | 3.41764800  | -2.91475400 | 3.17848800  |
| H  | 5.41259700  | -2.10197000 | 1.90209600  |
| H  | 5.02537000  | -0.85131200 | -0.26133500 |
| N  | 1.85565800  | -1.50521800 | 0.57342000  |
| C  | 2.62110100  | -0.28503800 | -1.39848400 |
| O  | 1.37232400  | -0.26749900 | -1.73509100 |
| H  | -0.25922800 | 0.75284300  | -2.07823300 |
| O  | 3.54257900  | 0.25904800  | -1.97547700 |
| H  | -1.63446800 | -2.04396100 | 1.48630000  |
| Br | -1.38083800 | -2.96809000 | -0.67310400 |

**TS<sub>17-19</sub>**

|    |             |             |             |
|----|-------------|-------------|-------------|
| Zn | -0.48340800 | -0.86864600 | -0.12205900 |
| O  | 0.47462300  | 0.57033800  | 0.74686300  |
| C  | 1.31432900  | 1.28589400  | 0.01354900  |
| H  | 1.13325700  | 0.88896200  | -1.14787200 |
| C  | 1.04881700  | 2.77130000  | -0.07564700 |
| C  | -0.18189800 | 3.27681500  | 0.34068000  |
| C  | 2.00517800  | 3.64273600  | -0.60246100 |
| C  | -0.45473200 | 4.63641700  | 0.23553000  |
| H  | -0.90648700 | 2.59388500  | 0.76774400  |
| C  | 1.73050500  | 5.00052300  | -0.70700000 |

|   |             |             |             |
|---|-------------|-------------|-------------|
| H | 2.96548200  | 3.24877800  | -0.91353500 |
| C | 0.49928600  | 5.50142300  | -0.29096700 |
| H | -1.41084500 | 5.02308400  | 0.57386300  |
| H | 2.48136000  | 5.67221800  | -1.11045900 |
| H | 0.28750800  | 6.56259700  | -0.37220400 |
| O | 0.36461400  | 0.07021800  | -2.01924800 |
| H | -0.00070700 | 0.83021000  | -2.49083300 |
| O | -0.71349600 | -0.93574700 | -3.04204200 |
| C | 3.08437900  | -0.27984500 | 0.32393100  |
| H | 2.58980700  | -0.75218800 | 1.17845100  |
| H | 2.77498800  | -0.82032300 | -0.58130700 |
| C | 4.59145600  | -0.30431600 | 0.47969700  |
| H | 5.04705200  | 0.18871900  | -0.38708800 |
| H | 4.86268800  | 0.29251100  | 1.35841300  |
| C | 5.14105500  | -1.72248100 | 0.62032900  |
| H | 4.67491200  | -2.20932900 | 1.48560200  |
| H | 4.84621700  | -2.31604400 | -0.25343600 |
| C | 6.65847600  | -1.75813200 | 0.77243000  |
| H | 7.02469000  | -2.78369500 | 0.87248600  |
| H | 7.15438400  | -1.31190200 | -0.09560200 |
| H | 6.98125800  | -1.20202000 | 1.65856000  |
| O | 2.67123800  | 1.08235000  | 0.22249400  |
| C | -3.17752600 | -0.39503100 | -1.38154200 |
| C | -4.52687000 | -0.07568800 | -1.49380800 |
| C | -5.25755700 | 0.19404800  | -0.34645200 |
| C | -4.61910200 | 0.12223000  | 0.88574000  |



|    |             |             |             |
|----|-------------|-------------|-------------|
| C  | -3.27499200 | -0.21786600 | 0.91843900  |
| H  | -2.54454200 | -0.61563600 | -2.24066600 |
| H  | -4.98410000 | -0.04070200 | -2.47538500 |
| H  | -6.30944100 | 0.45127100  | -0.40495400 |
| H  | -5.13064500 | 0.31580500  | 1.82010700  |
| N  | -2.56235400 | -0.45855200 | -0.19506600 |
| C  | -2.59905700 | -0.32857300 | 2.24877100  |
| O  | -1.42970700 | -0.97564500 | 2.15109900  |
| H  | -0.96094600 | -0.92977000 | 2.99595700  |
| O  | -3.06138800 | 0.09205200  | 3.27345200  |
| H  | -0.22310000 | -1.75159200 | -2.86738300 |
| Br | 0.10709700  | -3.12545300 | -0.41861400 |

## 19

|    |             |             |             |
|----|-------------|-------------|-------------|
| Zn | -0.67368700 | -0.93505500 | -0.34371900 |
| O  | 0.52675200  | 0.65449700  | 0.28491600  |
| C  | 1.65808900  | 1.13569200  | 0.29515000  |
| H  | 1.44094600  | 1.44567700  | -3.03699400 |
| C  | 1.87322900  | 2.59871900  | 0.39168300  |
| C  | 0.77809000  | 3.41801100  | 0.67313700  |
| C  | 3.13584900  | 3.16276300  | 0.19623100  |
| C  | 0.94617900  | 4.79254300  | 0.76646500  |
| H  | -0.19237200 | 2.95949200  | 0.82177000  |
| C  | 3.29730100  | 4.53906900  | 0.28327500  |
| H  | 3.97450900  | 2.51818200  | -0.03416600 |
| C  | 2.20534600  | 5.35398200  | 0.57028200  |

|   |             |             |             |
|---|-------------|-------------|-------------|
| H | 0.09640900  | 5.42803400  | 0.99174700  |
| H | 4.27632300  | 4.97827900  | 0.12477400  |
| H | 2.33579600  | 6.42901800  | 0.63990900  |
| O | 1.85151700  | 0.68025000  | -2.63090400 |
| H | 1.12206500  | 0.01763900  | -2.56974900 |
| O | -0.14396100 | -1.05847700 | -2.17604100 |
| C | 2.69252700  | -0.98910800 | 0.06790300  |
| H | 2.12618200  | -1.43792600 | 0.88853700  |
| H | 2.15392300  | -1.14960900 | -0.86803300 |
| C | 4.10839100  | -1.51503200 | -0.00094600 |
| H | 4.63727200  | -0.99461300 | -0.80683100 |
| H | 4.62842600  | -1.27541800 | 0.93407800  |
| C | 4.14161900  | -3.02341200 | -0.24376700 |
| H | 3.58192500  | -3.53424300 | 0.54846600  |
| H | 3.61756100  | -3.25058700 | -1.17972500 |
| C | 5.56123900  | -3.57744400 | -0.30802100 |
| H | 5.55806500  | -4.65602200 | -0.48715800 |
| H | 6.13372600  | -3.10800700 | -1.11436900 |
| H | 6.09975800  | -3.39830200 | 0.62816700  |
| O | 2.76944700  | 0.44200000  | 0.28766000  |
| C | -2.84481200 | 0.10245000  | -2.03677000 |
| C | -4.06768500 | 0.54278000  | -2.53025700 |
| C | -5.06520600 | 0.90226100  | -1.63572300 |
| C | -4.80241700 | 0.81846300  | -0.27471400 |
| C | -3.54713100 | 0.39192300  | 0.13887900  |
| H | -2.02450800 | -0.22933900 | -2.67117900 |

|    |             |             |             |
|----|-------------|-------------|-------------|
| H  | -4.22618700 | 0.58813100  | -3.60119900 |
| H  | -6.03430900 | 1.23826000  | -1.98829200 |
| H  | -5.53884500 | 1.07143800  | 0.47747300  |
| N  | -2.58561100 | 0.03177400  | -0.72532100 |
| C  | -3.28200900 | 0.31853900  | 1.61123600  |
| O  | -1.97785000 | 0.25222700  | 1.88185400  |
| H  | -1.86771700 | 0.06149300  | 2.82377200  |
| O  | -4.15410800 | 0.33773600  | 2.43983500  |
| H  | 0.00166700  | -1.96931500 | -2.44029000 |
| Br | -0.72276200 | -2.80577400 | 1.10929400  |

## 20

|    |             |             |             |
|----|-------------|-------------|-------------|
| Zn | -0.80378000 | -0.07862700 | -0.94226000 |
| O  | 0.06150600  | -1.73662300 | -1.15047900 |
| C  | 1.31294600  | -1.92476400 | -1.72409000 |
| H  | 1.58803900  | -1.13344500 | -2.44173600 |
| C  | 2.43950400  | -2.04553900 | -0.71084100 |
| C  | 2.16086600  | -2.37049000 | 0.61861400  |
| C  | 3.77310100  | -1.86306900 | -1.08819100 |
| C  | 3.19029900  | -2.50852300 | 1.54968700  |
| H  | 1.12458700  | -2.53346700 | 0.89721000  |
| C  | 4.80066100  | -2.00661900 | -0.16341500 |
| H  | 4.00613400  | -1.60603000 | -2.11842600 |
| C  | 4.51301700  | -2.32792100 | 1.16184600  |
| H  | 2.95635600  | -2.76808500 | 2.57772900  |
| H  | 5.83067200  | -1.86095000 | -0.47393900 |

|   |             |             |             |
|---|-------------|-------------|-------------|
| H | 5.31574700  | -2.43757800 | 1.88360800  |
| O | 1.06998700  | 0.65858400  | 0.21558900  |
| H | 1.52605100  | -0.12480100 | 0.57365500  |
| O | 1.16334700  | 1.62820600  | 1.27394700  |
| C | 2.20823700  | 2.59706400  | 0.97033000  |
| C | 1.89579400  | 3.31901700  | -0.33231200 |
| H | 2.64781100  | 4.09032500  | -0.52109600 |
| H | 1.89535400  | 2.62406400  | -1.17275400 |
| H | 0.91296700  | 3.79300000  | -0.28819600 |
| C | 3.56218000  | 1.89881800  | 0.92979300  |
| H | 4.35947700  | 2.63064100  | 0.77530000  |
| H | 3.75479700  | 1.37277700  | 1.86859700  |
| H | 3.60708800  | 1.17859900  | 0.11032400  |
| C | 2.10120500  | 3.53096000  | 2.17211000  |
| H | 2.86375000  | 4.30965500  | 2.09601000  |
| H | 1.12105800  | 4.01267900  | 2.20454600  |
| H | 2.25729800  | 2.98386400  | 3.10519000  |
| C | -1.98665400 | 1.01640500  | 1.66347300  |
| C | -2.75371600 | 1.08566600  | 2.82069800  |
| C | -3.61743600 | 0.04126000  | 3.12057100  |
| C | -3.69229000 | -1.03789100 | 2.24937700  |
| C | -2.91006600 | -1.01706300 | 1.10375300  |
| H | -1.27955700 | 1.79480700  | 1.40196900  |
| H | -2.66260400 | 1.94637600  | 3.47220000  |
| H | -4.22385500 | 0.06494100  | 4.01933600  |
| H | -4.33740300 | -1.88859600 | 2.42996200  |

|    |             |             |             |
|----|-------------|-------------|-------------|
| N  | -2.06426800 | -0.01533200 | 0.81995400  |
| C  | -2.96542200 | -2.16737800 | 0.14713200  |
| O  | -2.60946600 | -1.77862500 | -1.08519000 |
| H  | -2.28666500 | -2.53881600 | -1.59136000 |
| O  | -3.28848700 | -3.28068500 | 0.45705700  |
| H  | 1.30819800  | -2.86322500 | -2.30721600 |
| Br | -1.40258400 | 1.77637000  | -2.24546800 |

## 21

|    |             |             |             |
|----|-------------|-------------|-------------|
| Zn | 0.51065900  | 0.08744600  | 0.81337700  |
| O  | -0.17161600 | -1.52670600 | 0.13104500  |
| C  | 0.60546000  | -2.70150400 | 0.12561500  |
| H  | 0.06159700  | -3.47695500 | -0.43077000 |
| C  | 1.93799600  | -2.44209300 | -0.53758000 |
| C  | 2.02948300  | -2.36533100 | -1.93080200 |
| C  | 3.06604500  | -2.13292700 | 0.22527400  |
| C  | 3.21105200  | -1.97123200 | -2.54718400 |
| H  | 1.15638200  | -2.60096800 | -2.53176300 |
| C  | 4.25314300  | -1.73105200 | -0.38622500 |
| H  | 3.01067700  | -2.18825200 | 1.30855800  |
| C  | 4.32621200  | -1.64135400 | -1.77465300 |
| H  | 3.26729300  | -1.91617600 | -3.62958600 |
| H  | 5.11926800  | -1.49051900 | 0.22170000  |
| H  | 5.24971500  | -1.33355900 | -2.25418100 |
| O  | -2.55323000 | -0.85482600 | 0.93236600  |
| H  | -1.74229600 | -1.29175900 | 0.54669100  |
| O  | -3.30523700 | -0.50362100 | -0.24293500 |

|   |             |             |             |
|---|-------------|-------------|-------------|
| C | -4.45462400 | -1.36763800 | -0.36395500 |
| C | -5.35849300 | -1.20514700 | 0.85456800  |
| H | -6.25043400 | -1.83138800 | 0.76019900  |
| H | -4.82336300 | -1.49354600 | 1.76057200  |
| H | -5.67587900 | -0.16367400 | 0.95634300  |
| C | -4.01099200 | -2.81647800 | -0.54472800 |
| H | -4.87512600 | -3.46408300 | -0.71844600 |
| H | -3.33429100 | -2.90273500 | -1.39913300 |
| H | -3.49268500 | -3.17148100 | 0.34805900  |
| C | -5.12169200 | -0.83352700 | -1.62747500 |
| H | -6.03321100 | -1.39847600 | -1.83850300 |
| H | -5.38830100 | 0.21920300  | -1.50383100 |
| H | -4.44996700 | -0.92358900 | -2.48481100 |
| C | -1.61931100 | 2.11588800  | 0.11116900  |
| C | -2.19323700 | 3.23428700  | -0.48435700 |
| C | -1.47339700 | 3.93592800  | -1.43957600 |
| C | -0.20202500 | 3.49168600  | -1.78427800 |
| C | 0.30016500  | 2.36951400  | -1.14403700 |
| H | -2.15296200 | 1.51585400  | 0.83939500  |
| H | -3.19322700 | 3.53478900  | -0.19684700 |
| H | -1.89575300 | 4.81254000  | -1.91816400 |
| H | 0.40615700  | 3.98404600  | -2.53245100 |
| N | -0.39171500 | 1.70078700  | -0.20775200 |
| C | 1.65300800  | 1.86117000  | -1.53037000 |
| O | 2.01016800  | 0.80120300  | -0.78262700 |
| H | 2.84829900  | 0.41032000  | -1.08600300 |

|    |            |             |             |
|----|------------|-------------|-------------|
| O  | 2.32907500 | 2.32912000  | -2.40276700 |
| H  | 0.77347400 | -3.08473200 | 1.14365900  |
| Br | 1.44773800 | 0.77039300  | 2.83666200  |

**TS<sub>20-22</sub>**

|    |             |             |             |
|----|-------------|-------------|-------------|
| Zn | 0.55940500  | 0.31573000  | -0.82400900 |
| O  | -1.34476300 | 0.54356500  | -1.09374000 |
| C  | -2.03602200 | -0.59380500 | -1.12066200 |
| H  | -1.37050000 | -1.41912900 | -0.45805200 |
| C  | -3.39660600 | -0.58937600 | -0.51061100 |
| C  | -3.81725800 | 0.48259600  | 0.28012800  |
| C  | -4.26423800 | -1.66896900 | -0.71166900 |
| C  | -5.08071400 | 0.47440600  | 0.85820900  |
| H  | -3.14390300 | 1.32188900  | 0.41095800  |
| C  | -5.52477700 | -1.67809800 | -0.13029400 |
| H  | -3.94618500 | -2.50304300 | -1.33173400 |
| C  | -5.93649000 | -0.60582200 | 0.65855200  |
| H  | -5.40370300 | 1.31613100  | 1.46265600  |
| H  | -6.19111400 | -2.51845300 | -0.29564900 |
| H  | -6.92307700 | -0.61050500 | 1.11017200  |
| O  | -0.23112300 | -1.67833200 | 0.23597400  |
| H  | -0.64180200 | -1.51697700 | 1.09612500  |
| O  | 1.30349400  | -1.91635000 | 1.24296900  |
| C  | 1.68493400  | -3.26464400 | 1.18266200  |
| C  | 1.96653200  | -3.70600700 | -0.25345200 |
| H  | 2.33566100  | -4.73607900 | -0.27908400 |

|    |             |             |             |
|----|-------------|-------------|-------------|
| H  | 1.05121600  | -3.65031400 | -0.84606600 |
| H  | 2.70676000  | -3.05023100 | -0.71520200 |
| C  | 0.63110100  | -4.16037300 | 1.84175900  |
| H  | 0.96476500  | -5.20137800 | 1.88572600  |
| H  | 0.42722100  | -3.81990600 | 2.86146200  |
| H  | -0.29945400 | -4.12782800 | 1.26954900  |
| C  | 2.98956400  | -3.29285100 | 2.00648400  |
| H  | 3.38406500  | -4.31341300 | 2.03230700  |
| H  | 3.73726000  | -2.63912400 | 1.55272400  |
| H  | 2.80471800  | -2.96497300 | 3.03273100  |
| C  | 1.51155300  | 0.98316000  | 1.98425200  |
| C  | 1.75412700  | 1.72737200  | 3.13444100  |
| C  | 1.45707000  | 3.08171600  | 3.14089200  |
| C  | 0.93559400  | 3.65538100  | 1.98810600  |
| C  | 0.74163300  | 2.85199200  | 0.87411400  |
| H  | 1.70159800  | -0.08682700 | 1.93654800  |
| H  | 2.16544000  | 1.23530400  | 4.00767100  |
| H  | 1.62855000  | 3.68493700  | 4.02564700  |
| H  | 0.67920400  | 4.70523300  | 1.92306300  |
| N  | 1.01319500  | 1.53581900  | 0.87300000  |
| C  | 0.21172600  | 3.48830500  | -0.37314100 |
| O  | 0.42470800  | 2.71552500  | -1.44380200 |
| H  | -0.02609900 | 3.09183400  | -2.21234600 |
| O  | -0.31221500 | 4.56849300  | -0.40167100 |
| H  | -2.00811400 | -1.15263100 | -2.07579000 |
| Br | 2.30873700  | -0.23543500 | -2.26287400 |



22

|    |             |             |             |
|----|-------------|-------------|-------------|
| Zn | -1.00817900 | -0.09761100 | 0.45369900  |
| O  | 1.13361700  | -0.27376900 | 0.21013100  |
| C  | 1.78915500  | -1.08274700 | -0.44621400 |
| H  | -0.23546600 | -1.75031800 | -3.49892000 |
| C  | 3.24510700  | -1.17283400 | -0.36658800 |
| C  | 3.98724900  | -0.33670900 | 0.47770800  |
| C  | 3.89498200  | -2.12613700 | -1.15855800 |
| C  | 5.36550500  | -0.45928300 | 0.52648300  |
| H  | 3.46719800  | 0.39798600  | 1.08149600  |
| C  | 5.27724400  | -2.24604800 | -1.10586000 |
| H  | 3.30715800  | -2.76657800 | -1.80922200 |
| C  | 6.00901000  | -1.41352500 | -0.26368300 |
| H  | 5.94579400  | 0.18449200  | 1.17842500  |
| H  | 5.78424800  | -2.98511900 | -1.71624800 |
| H  | 7.08931100  | -1.50692800 | -0.22042500 |
| O  | -0.13059200 | -2.13126500 | -2.62508400 |
| H  | -0.81474300 | -1.67645700 | -2.06469400 |
| O  | -1.89305400 | -0.92574400 | -1.02445700 |
| C  | -3.05171600 | -1.75267900 | -0.90684900 |
| C  | -2.68223200 | -3.07292400 | -0.22374200 |
| H  | -3.54370100 | -3.74625300 | -0.16240000 |
| H  | -1.89203400 | -3.57461100 | -0.78945000 |
| H  | -2.32162700 | -2.88792100 | 0.79187800  |
| C  | -3.55282100 | -2.02841800 | -2.32994600 |

|    |             |             |             |
|----|-------------|-------------|-------------|
| H  | -4.44017200 | -2.66876500 | -2.32232800 |
| H  | -3.81454900 | -1.09035000 | -2.83055900 |
| H  | -2.77445500 | -2.52826700 | -2.91253800 |
| C  | -4.13697500 | -1.02316900 | -0.11126500 |
| H  | -5.05110500 | -1.62183000 | -0.04285500 |
| H  | -3.79545900 | -0.81506500 | 0.90705100  |
| H  | -4.38906500 | -0.07401400 | -0.59565100 |
| C  | -1.46883400 | 1.87193400  | -1.75881500 |
| C  | -1.32361600 | 2.90764500  | -2.67536200 |
| C  | -0.44556700 | 3.94232700  | -2.38875300 |
| C  | 0.24947500  | 3.91150400  | -1.18669200 |
| C  | 0.02130900  | 2.85930600  | -0.31024500 |
| H  | -2.08942200 | 0.99844100  | -1.94034700 |
| H  | -1.88642300 | 2.88476900  | -3.60107500 |
| H  | -0.29960600 | 4.75886200  | -3.08758500 |
| H  | 0.95881600  | 4.67927700  | -0.90438200 |
| N  | -0.81655800 | 1.84808000  | -0.59108100 |
| C  | 0.74938300  | 2.85920100  | 0.99950600  |
| O  | 0.09554100  | 2.13971000  | 1.90446000  |
| H  | 0.61335300  | 2.07324200  | 2.71848600  |
| O  | 1.77619900  | 3.45879500  | 1.19114200  |
| H  | 1.28346200  | -1.76109200 | -1.15220200 |
| Br | -1.33011100 | -0.64280600 | 2.73211100  |

**23**

|   |             |             |            |
|---|-------------|-------------|------------|
| H | -0.65201800 | -1.64652900 | 0.19614700 |
|---|-------------|-------------|------------|

|    |             |             |             |
|----|-------------|-------------|-------------|
| O  | 0.76217600  | -1.78531100 | -0.50981400 |
| O  | -1.52000600 | -1.48374400 | 0.68091500  |
| Zn | 1.80289800  | -0.21926700 | -0.46462900 |
| C  | 1.07962800  | -2.91675000 | -1.31371300 |
| C  | -2.40174300 | -0.83722100 | -0.12627600 |
| H  | -2.33604400 | -1.15595000 | -1.17923100 |
| C  | 2.57206000  | -3.23564900 | -1.18236300 |
| H  | 2.82324400  | -3.41640400 | -0.13268200 |
| H  | 2.84915300  | -4.12370000 | -1.75906700 |
| H  | 3.17717900  | -2.39984600 | -1.55351900 |
| C  | 0.25298500  | -4.09602100 | -0.79467000 |
| H  | 0.49259900  | -4.29193400 | 0.25396500  |
| H  | -0.81565700 | -3.87482700 | -0.85814600 |
| H  | 0.45097800  | -5.00333500 | -1.37345200 |
| C  | 0.73157700  | -2.62347600 | -2.77609000 |
| H  | -0.33377600 | -2.39301800 | -2.87001200 |
| H  | 1.30095200  | -1.76225900 | -3.13829300 |
| H  | 0.95378700  | -3.47789700 | -3.42374200 |
| C  | -3.81220700 | -0.98955800 | 0.38644400  |
| C  | -4.80932400 | -1.53152900 | -0.41859100 |
| C  | -4.11866900 | -0.59713000 | 1.69081800  |
| C  | -6.10524300 | -1.68382900 | 0.06964700  |
| H  | -4.57254300 | -1.84327300 | -1.43223800 |
| C  | -5.40979900 | -0.74758800 | 2.17737700  |
| H  | -3.33651100 | -0.17833400 | 2.31418600  |
| C  | -6.40632300 | -1.29134000 | 1.36798700  |

|   |             |             |             |
|---|-------------|-------------|-------------|
| H | -6.87615000 | -2.10969700 | -0.56421500 |
| H | -5.64265900 | -0.44234500 | 3.19243900  |
| H | -7.41460600 | -1.40860600 | 1.75168700  |
| C | -2.67019900 | 1.39080400  | -1.12456100 |
| H | -2.39549400 | 1.00873500  | -2.11826000 |
| H | -3.75725100 | 1.30112700  | -1.01375600 |
| C | -2.23714100 | 2.83532700  | -0.96388000 |
| H | -2.47439400 | 3.16001300  | 0.05553900  |
| H | -1.14868800 | 2.90320000  | -1.07500500 |
| C | -2.91217900 | 3.75925900  | -1.97654600 |
| H | -2.68055000 | 3.41788900  | -2.99292500 |
| C | -2.48576500 | 5.21564400  | -1.82095600 |
| H | -2.98334700 | 5.85593100  | -2.55438400 |
| H | -2.73371000 | 5.59543000  | -0.82481800 |
| H | -1.40604000 | 5.32839100  | -1.95925500 |
| H | -4.00118100 | 3.68302200  | -1.86869100 |
| O | -2.04114900 | 0.59155400  | -0.12115400 |
| C | 1.93846800  | 0.77349900  | 2.34828200  |
| C | 3.96423400  | -0.14496400 | 1.74573800  |
| C | 4.50738800  | 0.13801600  | 2.99218200  |
| C | 3.71101300  | 0.76199100  | 3.94464400  |
| C | 2.40103400  | 1.08750300  | 3.61851200  |
| H | 4.54901100  | -0.62290400 | 0.96722500  |
| H | 5.53613400  | -0.12775600 | 3.20334300  |
| H | 4.10648800  | 0.99506500  | 4.92710800  |
| H | 1.72847200  | 1.57531800  | 4.31273900  |

|    |             |            |             |
|----|-------------|------------|-------------|
| N  | 2.70382600  | 0.16186900 | 1.43515600  |
| C  | 0.52857100  | 1.11962000 | 1.96096300  |
| O  | -0.27833100 | 1.53448700 | 2.74760700  |
| O  | 0.31021900  | 0.92086100 | 0.65994000  |
| H  | -0.69142500 | 0.86891200 | 0.39748900  |
| Br | 3.07133800  | 0.95680300 | -2.04220100 |

## 24

|    |             |             |             |
|----|-------------|-------------|-------------|
| H  | -1.11997700 | -1.81786800 | -0.78735300 |
| O  | -2.05385200 | -1.60390100 | -0.59643400 |
| O  | 0.38133000  | -0.81708400 | -0.23680300 |
| Zn | -1.12714000 | 0.17301400  | 0.49008500  |
| C  | -2.72273100 | -2.79932700 | -0.11676500 |
| C  | 1.62715400  | -0.88191200 | 0.26450100  |
| H  | 1.66037200  | -1.06054000 | 1.35590100  |
| C  | -4.09716600 | -2.34564500 | 0.35325900  |
| H  | -4.66073700 | -1.90891500 | -0.47679400 |
| H  | -4.66794400 | -3.19436900 | 0.73833600  |
| H  | -4.00062400 | -1.60547700 | 1.15178700  |
| C  | -2.83190400 | -3.77108500 | -1.29021200 |
| H  | -3.36300500 | -3.30395700 | -2.12342600 |
| H  | -1.83909600 | -4.07025500 | -1.64052600 |
| H  | -3.37134000 | -4.67638000 | -0.99694900 |
| C  | -1.92221400 | -3.40930800 | 1.03104900  |
| H  | -0.91814000 | -3.68833400 | 0.69760300  |
| H  | -1.82968700 | -2.69816800 | 1.85514400  |

|   |             |             |             |
|---|-------------|-------------|-------------|
| H | -2.41544900 | -4.31135800 | 1.40468600  |
| C | 2.46377800  | -1.92706300 | -0.44580000 |
| C | 3.01876500  | -2.99322200 | 0.25581300  |
| C | 2.65340000  | -1.84497400 | -1.82674100 |
| C | 3.75508300  | -3.97207400 | -0.40917300 |
| H | 2.87151300  | -3.06134800 | 1.33038900  |
| C | 3.39082800  | -2.81589000 | -2.49041800 |
| H | 2.21857500  | -1.01202300 | -2.36814600 |
| C | 3.94257800  | -3.88367900 | -1.78308900 |
| H | 4.18164000  | -4.80059000 | 0.14709800  |
| H | 3.53798500  | -2.74393400 | -3.56349000 |
| H | 4.51757600  | -4.64222800 | -2.30434500 |
| C | 3.48731500  | 0.63031500  | 0.80317300  |
| H | 3.29335200  | 0.51090200  | 1.87947000  |
| H | 4.20195900  | -0.14545500 | 0.50269400  |
| C | 4.04818000  | 2.00875500  | 0.50851800  |
| H | 4.17986800  | 2.11106600  | -0.57427400 |
| H | 3.31845400  | 2.77036600  | 0.80757400  |
| C | 5.37376500  | 2.25938200  | 1.22521200  |
| H | 5.23327300  | 2.13534600  | 2.30622000  |
| C | 5.94637900  | 3.64500700  | 0.94328400  |
| H | 6.89483100  | 3.79817600  | 1.46558800  |
| H | 6.12849300  | 3.78713400  | -0.12656300 |
| H | 5.25727800  | 4.43112100  | 1.26745700  |
| H | 6.10029700  | 1.49503400  | 0.92286000  |
| O | 2.27345300  | 0.44505000  | 0.07626400  |

|    |             |            |             |
|----|-------------|------------|-------------|
| C  | -1.47121100 | 2.54764500 | -1.33974700 |
| C  | -3.43511100 | 1.36217300 | -1.11610400 |
| C  | -4.11174200 | 2.25215100 | -1.93924000 |
| C  | -3.41569100 | 3.32369700 | -2.48520800 |
| C  | -2.06739400 | 3.46967200 | -2.18894800 |
| H  | -3.92768400 | 0.50163100 | -0.67969300 |
| H  | -5.16396600 | 2.09888900 | -2.14654200 |
| H  | -3.91601800 | 4.03321600 | -3.13517700 |
| H  | -1.46301900 | 4.27114100 | -2.59484400 |
| N  | -2.14274000 | 1.51110200 | -0.81846700 |
| C  | -0.00650300 | 2.65393700 | -1.01592100 |
| O  | 0.75930700  | 3.28771000 | -1.69392300 |
| O  | 0.29676500  | 1.96449300 | 0.07622500  |
| H  | 1.22545100  | 1.51982700 | 0.06305700  |
| Br | -1.95314900 | 0.34993500 | 2.68633300  |

## 25

|    |             |             |             |
|----|-------------|-------------|-------------|
| Zn | 0.31270300  | -0.87131900 | 0.55358800  |
| O  | -1.13837900 | -0.16445900 | -0.42033600 |
| C  | -1.79646700 | 1.01028800  | -0.16280400 |
| H  | -1.65948800 | 1.33023500  | 0.89062300  |
| C  | -1.34715900 | 2.15568900  | -1.06576600 |
| C  | -0.60649100 | 1.90628000  | -2.22003800 |
| C  | -1.68517800 | 3.47280400  | -0.75042600 |
| C  | -0.20093600 | 2.95739300  | -3.04239300 |
| H  | -0.37963400 | 0.87513100  | -2.46981400 |

|   |             |             |             |
|---|-------------|-------------|-------------|
| C | -1.28151900 | 4.52203500  | -1.56734900 |
| H | -2.27650200 | 3.67019500  | 0.13871000  |
| C | -0.53432300 | 4.26702400  | -2.71597000 |
| H | 0.36738000  | 2.75021500  | -3.94395400 |
| H | -1.55084900 | 5.54197200  | -1.31139000 |
| H | -0.21954000 | 5.08627000  | -3.35425200 |
| O | 1.35729400  | 1.19510400  | 0.27648000  |
| H | 1.02358900  | 1.61522000  | -0.53701800 |
| O | 2.76608800  | 1.48033000  | 0.26264400  |
| C | 3.05838200  | 2.60496900  | 1.14232400  |
| C | 2.62620500  | 2.28773100  | 2.56657900  |
| H | 2.93178200  | 3.09570600  | 3.23736500  |
| H | 1.54313000  | 2.17784100  | 2.63163800  |
| H | 3.08102900  | 1.35634200  | 2.90986900  |
| C | 2.39051100  | 3.86452800  | 0.60395100  |
| H | 2.66547600  | 4.72763400  | 1.21595600  |
| H | 2.70248700  | 4.05919800  | -0.42567700 |
| H | 1.30227400  | 3.77438800  | 0.62796300  |
| C | 4.57693400  | 2.68479500  | 1.02025600  |
| H | 4.94545500  | 3.52819800  | 1.60881200  |
| H | 5.04544600  | 1.77253300  | 1.39714800  |
| H | 4.87696300  | 2.83248900  | -0.02018800 |
| C | 3.03839200  | -1.58162700 | -0.60215100 |
| C | 4.00507500  | -2.19661000 | -1.38924600 |
| C | 3.61021000  | -3.13776100 | -2.32996600 |
| C | 2.25948200  | -3.43695900 | -2.45263900 |



|    |             |             |             |
|----|-------------|-------------|-------------|
| C  | 1.36148700  | -2.79501100 | -1.61222300 |
| H  | 3.29473600  | -0.81720300 | 0.12214100  |
| H  | 5.04714600  | -1.92906700 | -1.26264000 |
| H  | 4.34141000  | -3.63059100 | -2.96123400 |
| H  | 1.88453700  | -4.15065400 | -3.17548200 |
| N  | 1.74049000  | -1.87801700 | -0.70929500 |
| C  | -0.10074500 | -3.09141300 | -1.72866800 |
| O  | -0.73631200 | -2.81909200 | -0.58006600 |
| H  | -1.67726400 | -2.66841300 | -0.75180500 |
| O  | -0.61960400 | -3.51784100 | -2.72269600 |
| Br | 0.82562900  | -1.42979400 | 2.76712300  |
| C  | -3.84343500 | 0.04462600  | 0.53952600  |
| H  | -3.42544900 | -0.96995600 | 0.49080400  |
| H  | -3.67707300 | 0.41511100  | 1.56511100  |
| C  | -5.32464700 | 0.02480900  | 0.21514000  |
| H  | -5.44797300 | -0.31352400 | -0.82051300 |
| H  | -5.70601300 | 1.05209700  | 0.25337500  |
| C  | -6.13058700 | -0.86753500 | 1.15668400  |
| H  | -5.72690900 | -1.88776600 | 1.12672500  |
| H  | -5.99962200 | -0.52082600 | 2.18957000  |
| C  | -7.61794000 | -0.90135500 | 0.81733900  |
| H  | -7.78281000 | -1.27962300 | -0.19697300 |
| H  | -8.17198000 | -1.54531800 | 1.50671100  |
| H  | -8.05853100 | 0.09971600  | 0.87051600  |
| O  | -3.19136900 | 0.89004900  | -0.38814200 |

**TS<sub>25-26</sub>**

|    |             |             |             |
|----|-------------|-------------|-------------|
| Zn | 0.44200100  | -0.57078600 | -0.63894100 |
| O  | -0.42981300 | 1.14194200  | -0.90376900 |
| C  | -1.25009900 | 1.56357800  | 0.04778000  |
| H  | -1.08217000 | 0.76922200  | 0.98241900  |
| C  | -0.94305000 | 2.90686000  | 0.66964200  |
| C  | 0.31128200  | 3.48378800  | 0.47467500  |
| C  | -1.87973800 | 3.56013200  | 1.47449300  |
| C  | 0.62688800  | 4.69879500  | 1.07344900  |
| H  | 1.02030800  | 2.97879100  | -0.17051100 |
| C  | -1.56256700 | 4.77377500  | 2.07148900  |
| H  | -2.85777200 | 3.11540100  | 1.61497900  |
| C  | -0.30762100 | 5.34559200  | 1.87582300  |
| H  | 1.60142000  | 5.14631700  | 0.90549400  |
| H  | -2.29838400 | 5.27838100  | 2.68936400  |
| H  | -0.06232300 | 6.29403400  | 2.34257000  |
| O  | -0.31979700 | -0.30269700 | 1.53191500  |
| H  | 0.19588500  | 0.31005400  | 2.07341300  |
| O  | 0.74538200  | -1.60935100 | 2.21282000  |
| C  | -0.01353700 | -2.40102500 | 3.09265600  |
| C  | -1.22703100 | -3.01242500 | 2.39327100  |
| H  | -1.75047600 | -3.70491600 | 3.05963600  |
| H  | -1.92320600 | -2.22396700 | 2.09926400  |
| H  | -0.91782500 | -3.54581500 | 1.49269000  |
| C  | -0.43046900 | -1.59603400 | 4.32678700  |
| H  | -0.94492500 | -2.22714700 | 5.05742200  |

|   |             |             |             |
|---|-------------|-------------|-------------|
| H | 0.44787600  | -1.15650500 | 4.80894300  |
| H | -1.11213900 | -0.79128900 | 4.03957500  |
| C | 0.97849600  | -3.51150300 | 3.49223100  |
| H | 0.49584900  | -4.19682300 | 4.19584400  |
| H | 1.29008600  | -4.07472400 | 2.61031500  |
| H | 1.86257700  | -3.08572200 | 3.97388100  |
| C | -3.06034000 | 0.28673900  | -0.83522100 |
| H | -2.58556100 | 0.18273000  | -1.81588700 |
| H | -2.75640900 | -0.57697100 | -0.22667700 |
| C | -4.56941700 | 0.35209000  | -0.95872900 |
| H | -5.00416600 | 0.46851100  | 0.04108400  |
| H | -4.83593900 | 1.25354500  | -1.52284800 |
| C | -5.15376900 | -0.88358500 | -1.64033600 |
| H | -4.70896900 | -0.99378700 | -2.63676100 |
| H | -4.86262300 | -1.78084200 | -1.08091800 |
| C | -6.67328600 | -0.83001000 | -1.76343100 |
| H | -7.06491300 | -1.72375800 | -2.25713900 |
| H | -7.14834700 | -0.75927900 | -0.77956400 |
| H | -6.99321000 | 0.03933000  | -2.34700300 |
| O | -2.61426500 | 1.48819200  | -0.21021700 |
| C | 3.15967500  | -0.62125500 | 0.71313900  |
| C | 4.51152900  | -0.38535500 | 0.94058300  |
| C | 5.24833400  | 0.30360900  | -0.01069100 |
| C | 4.61010900  | 0.72684300  | -1.16951000 |
| C | 3.26298400  | 0.43764300  | -1.33227000 |
| H | 2.53512500  | -1.14210800 | 1.43472000  |

|    |             |             |             |
|----|-------------|-------------|-------------|
| H  | 4.96532000  | -0.74030700 | 1.85812200  |
| H  | 6.30254200  | 0.50720700  | 0.14171900  |
| H  | 5.12328200  | 1.26948100  | -1.95333700 |
| N  | 2.54375900  | -0.21467800 | -0.40281600 |
| C  | 2.59765200  | 0.87192600  | -2.60174000 |
| O  | 1.44037400  | 0.23206300  | -2.79139200 |
| H  | 0.97907700  | 0.61104500  | -3.55228400 |
| O  | 3.06762500  | 1.67819900  | -3.35805600 |
| Br | -0.10024400 | -2.69490300 | -1.45558700 |

## 26

|    |             |             |             |
|----|-------------|-------------|-------------|
| Zn | -1.99370100 | -0.38209100 | -0.29318300 |
| O  | 1.63306200  | 0.31828800  | -0.01222800 |
| C  | 2.67492200  | 0.86453400  | -0.29889600 |
| H  | -1.48515900 | 1.54763100  | -2.07576300 |
| C  | 2.80634800  | 2.32189300  | -0.56922400 |
| C  | 1.63862500  | 3.08655600  | -0.62821100 |
| C  | 4.04941400  | 2.93153700  | -0.75631500 |
| C  | 1.71750700  | 4.45146900  | -0.87212200 |
| H  | 0.67938400  | 2.59842800  | -0.49545200 |
| C  | 4.12203800  | 4.29842200  | -0.99284800 |
| H  | 4.94899700  | 2.33003100  | -0.71428600 |
| C  | 2.95746600  | 5.05928400  | -1.05112500 |
| H  | 0.80855700  | 5.04134100  | -0.92615400 |
| H  | 5.08809700  | 4.77137200  | -1.13468500 |
| H  | 3.01675400  | 6.12638900  | -1.24005500 |

|   |             |             |             |
|---|-------------|-------------|-------------|
| O | -1.62718400 | 1.71453400  | -1.13850600 |
| H | -2.60543700 | 1.67337700  | -0.99185400 |
| O | -3.64413000 | 0.57490400  | -0.08219900 |
| C | -4.95627200 | 0.08953200  | -0.27877300 |
| C | -5.24214900 | -0.05241400 | -1.77880300 |
| H | -6.25695500 | -0.41833400 | -1.96796200 |
| H | -5.13378400 | 0.91742200  | -2.27509900 |
| H | -4.53391200 | -0.75055700 | -2.23465000 |
| C | -5.91780600 | 1.10735000  | 0.34419000  |
| H | -6.96369700 | 0.81154100  | 0.21315300  |
| H | -5.71736900 | 1.20678100  | 1.41506100  |
| H | -5.77598200 | 2.08732300  | -0.12094600 |
| C | -5.11887900 | -1.26914500 | 0.41184700  |
| H | -6.13768900 | -1.65815100 | 0.31388900  |
| H | -4.43762900 | -2.00401800 | -0.03219700 |
| H | -4.88627500 | -1.17963000 | 1.47738300  |
| C | 3.79769100  | -1.21064400 | -0.19059700 |
| H | 3.36911200  | -1.40956300 | 0.79495900  |
| H | 3.13140500  | -1.65393900 | -0.93681900 |
| C | 5.20941200  | -1.74234800 | -0.31393200 |
| H | 5.61040100  | -1.47097300 | -1.29724000 |
| H | 5.84393700  | -1.25051600 | 0.43264600  |
| C | 5.26786700  | -3.25783000 | -0.12836300 |
| H | 4.84079900  | -3.52170900 | 0.84657600  |
| H | 4.62987900  | -3.73987500 | -0.87920700 |
| C | 6.68489800  | -3.81284600 | -0.23398600 |

|    |             |             |             |
|----|-------------|-------------|-------------|
| H  | 6.69821900  | -4.89795500 | -0.10019800 |
| H  | 7.12434900  | -3.59350800 | -1.21222800 |
| H  | 7.33919500  | -3.37637300 | 0.52744500  |
| O  | 3.84113500  | 0.21472900  | -0.40692900 |
| C  | -1.64977800 | 1.25023100  | 2.10012800  |
| C  | -1.13768000 | 1.83253400  | 3.25277900  |
| C  | -0.11327300 | 1.19018200  | 3.93321900  |
| C  | 0.35089800  | -0.02574400 | 3.44995000  |
| C  | -0.22403300 | -0.54811500 | 2.30089100  |
| H  | -2.46163500 | 1.69102800  | 1.53137500  |
| H  | -1.54136800 | 2.77619600  | 3.59934800  |
| H  | 0.31403000  | 1.62410900  | 4.83062500  |
| H  | 1.14009600  | -0.58341600 | 3.93784100  |
| N  | -1.19406900 | 0.08539500  | 1.62639500  |
| C  | 0.23493600  | -1.88379000 | 1.81123800  |
| O  | -0.67955400 | -2.43727300 | 1.01112600  |
| H  | -0.30789200 | -3.21944500 | 0.57961000  |
| O  | 1.27265200  | -2.40049500 | 2.13263400  |
| Br | -1.35570500 | -1.75918300 | -2.10148200 |

**27**

|    |             |             |             |
|----|-------------|-------------|-------------|
| Zn | -0.77256000 | -0.06527200 | -0.75064400 |
| O  | 0.26626300  | -1.42400400 | -1.54162000 |
| C  | 1.45762800  | -1.22303000 | -2.22839000 |
| H  | 1.55224100  | -0.20739500 | -2.64812200 |
| C  | 2.69673900  | -1.50105500 | -1.39381100 |

|   |            |             |             |
|---|------------|-------------|-------------|
| C | 2.60813400 | -2.28131000 | -0.23889400 |
| C | 3.94954300 | -1.01126300 | -1.77420700 |
| C | 3.74443200 | -2.56623800 | 0.51830000  |
| H | 1.63557100 | -2.67742100 | 0.03528000  |
| C | 5.08390300 | -1.29889800 | -1.02431400 |
| H | 4.03448700 | -0.39888900 | -2.66837000 |
| C | 4.98570000 | -2.07688900 | 0.12790700  |
| H | 3.65867400 | -3.18124700 | 1.40901200  |
| H | 6.04891300 | -0.91022700 | -1.33463600 |
| H | 5.87170200 | -2.29932500 | 0.71344700  |
| O | 1.12342900 | 0.52718500  | 0.49786800  |
| H | 1.69917000 | -0.25849200 | 0.53305700  |
| O | 1.21409300 | 1.08425600  | 1.82037700  |
| C | 2.14349400 | 2.20664600  | 1.82699000  |
| C | 1.65431300 | 3.29874500  | 0.88652900  |
| H | 2.33362000 | 4.15521700  | 0.91983300  |
| H | 1.60808900 | 2.93441100  | -0.14053100 |
| H | 0.65510200 | 3.63706300  | 1.16957200  |
| C | 3.54202100 | 1.72138900  | 1.46578100  |
| H | 4.25908800 | 2.54192800  | 1.55303300  |
| H | 3.85764400 | 0.91674700  | 2.13524000  |
| H | 3.57824400 | 1.35467600  | 0.43784800  |
| C | 2.06722200 | 2.64268300  | 3.28687200  |
| H | 2.73704500 | 3.49052200  | 3.44894900  |
| H | 1.05251400 | 2.95363400  | 3.54677400  |
| H | 2.36908500 | 1.83045600  | 3.95266600  |

|   |             |             |             |
|---|-------------|-------------|-------------|
| C | -1.77425100 | -0.00629000 | 2.13616800  |
| C | -2.40030800 | -0.41207600 | 3.30889300  |
| C | -3.07313400 | -1.62615100 | 3.32847500  |
| C | -3.10212900 | -2.39551100 | 2.17223900  |
| C | -2.47265600 | -1.90565200 | 1.03719500  |
| H | -1.20926500 | 0.91662000  | 2.08129900  |
| H | -2.34851000 | 0.21788000  | 4.18865600  |
| H | -3.56618700 | -1.97148500 | 4.23052300  |
| H | -3.59722500 | -3.35738000 | 2.12513800  |
| N | -1.81293100 | -0.73772900 | 1.02016600  |
| C | -2.47338500 | -2.71347000 | -0.22322800 |
| O | -2.33159200 | -1.92015600 | -1.29416400 |
| H | -1.93789400 | -2.41753600 | -2.02680700 |
| O | -2.58387800 | -3.90781300 | -0.25196600 |
| I | -1.75948100 | 2.14665900  | -1.47748600 |
| H | 1.49758700  | -1.90594700 | -3.09589600 |

**TS<sub>27-28</sub>**

|    |             |             |             |
|----|-------------|-------------|-------------|
| Zn | 0.81488300  | 0.73856300  | -0.53730600 |
| O  | -0.83293600 | 1.64132700  | -0.32223700 |
| C  | -1.94829300 | 1.05552100  | -0.77229100 |
| H  | -1.94991200 | -0.13634700 | -0.35656800 |
| C  | -3.23566400 | 1.63743000  | -0.30344900 |
| C  | -3.26116300 | 2.55675800  | 0.74820000  |
| C  | -4.44171100 | 1.25186600  | -0.89974200 |
| C  | -4.46935200 | 3.07938300  | 1.19363700  |



|   |             |             |             |
|---|-------------|-------------|-------------|
| H | -2.31950600 | 2.85916700  | 1.19160700  |
| C | -5.64790000 | 1.77188800  | -0.45096600 |
| H | -4.42940300 | 0.54019000  | -1.72085000 |
| C | -5.66571700 | 2.68776800  | 0.59899000  |
| H | -4.47909000 | 3.79912900  | 2.00614500  |
| H | -6.57665200 | 1.46795600  | -0.92281200 |
| H | -6.60810200 | 3.09701800  | 0.94797200  |
| O | -1.59827300 | -1.22561600 | 0.25543900  |
| H | -2.07105500 | -1.02341700 | 1.07350200  |
| O | -1.07400400 | -2.73077200 | 1.21655900  |
| C | -1.49795000 | -3.86797900 | 0.51962800  |
| C | -0.86620200 | -3.94100900 | -0.87249400 |
| H | -1.14667800 | -4.86465600 | -1.38853600 |
| H | -1.19634600 | -3.09294000 | -1.47541900 |
| H | 0.22376600  | -3.90192400 | -0.79945000 |
| C | -3.02691100 | -3.91802600 | 0.43075700  |
| H | -3.37080000 | -4.84219700 | -0.04394200 |
| H | -3.46460900 | -3.85801800 | 1.43151600  |
| H | -3.39006300 | -3.07239500 | -0.15727500 |
| C | -0.98772800 | -5.03388500 | 1.39158200  |
| H | -1.28490000 | -5.98968500 | 0.94825100  |
| H | 0.10244900  | -5.00781800 | 1.46264100  |
| H | -1.40774600 | -4.96817100 | 2.39822800  |
| C | 1.31961400  | -0.95726200 | 1.89165500  |
| C | 1.87983100  | -1.34842800 | 3.10583300  |
| C | 2.77861200  | -0.50894100 | 3.74519200  |

|   |             |             |             |
|---|-------------|-------------|-------------|
| C | 3.09183500  | 0.71182700  | 3.15678700  |
| C | 2.49043300  | 1.03455000  | 1.95086900  |
| H | 0.59822200  | -1.59453500 | 1.37863000  |
| H | 1.59648900  | -2.30513800 | 3.52741600  |
| H | 3.23021600  | -0.79333500 | 4.68919600  |
| H | 3.78260900  | 1.41548100  | 3.60390300  |
| N | 1.62488700  | 0.21602900  | 1.32923900  |
| C | 2.81359700  | 2.34422800  | 1.31423100  |
| O | 2.13495700  | 2.51573400  | 0.15699200  |
| H | 2.37663500  | 3.36322300  | -0.24190500 |
| O | 3.57483600  | 3.15510500  | 1.75957800  |
| I | 1.96863700  | -0.25946700 | -2.52659100 |
| H | -1.96260000 | 0.81069200  | -1.84957200 |

## 28

|    |             |             |             |
|----|-------------|-------------|-------------|
| Zn | -0.67785600 | -0.36622000 | -0.05461400 |
| O  | 1.37013400  | 0.47786800  | 0.24051200  |
| C  | 2.38862200  | -0.05639700 | -0.18104400 |
| H  | 1.12430300  | 0.24327700  | -3.90875000 |
| C  | 3.73453700  | 0.35635800  | 0.21337700  |
| C  | 3.92733300  | 1.34660400  | 1.18451300  |
| C  | 4.83530700  | -0.25574500 | -0.39339500 |
| C  | 5.21326900  | 1.71634100  | 1.54192000  |
| H  | 3.05815400  | 1.80042400  | 1.64724600  |
| C  | 6.12293600  | 0.12169100  | -0.03648800 |
| H  | 4.67288400  | -1.01774500 | -1.14947400 |

|   |             |             |             |
|---|-------------|-------------|-------------|
| C | 6.30933300  | 1.10530500  | 0.93074600  |
| H | 5.37018800  | 2.47768800  | 2.29830400  |
| H | 6.97927500  | -0.34806700 | -0.50756100 |
| H | 7.31525200  | 1.39805500  | 1.21374800  |
| O | 1.47270100  | 0.21379500  | -3.01564700 |
| H | 0.80739400  | -0.33149000 | -2.51707100 |
| O | -0.30230500 | -1.23918300 | -1.68678000 |
| C | -0.51829200 | -2.60545100 | -1.99326000 |
| C | 0.43271200  | -3.48867200 | -1.17681600 |
| H | 0.28464400  | -4.55201000 | -1.39269000 |
| H | 1.47313200  | -3.23919700 | -1.40794200 |
| H | 0.26943000  | -3.33389500 | -0.10575600 |
| C | -0.23938000 | -2.78379700 | -3.48989300 |
| H | -0.37054500 | -3.82414800 | -3.80312200 |
| H | -0.92125900 | -2.15853600 | -4.07413400 |
| H | 0.78630800  | -2.47998500 | -3.71776700 |
| C | -1.97046000 | -2.98462700 | -1.68737500 |
| H | -2.18269600 | -4.02408100 | -1.95803900 |
| H | -2.17441200 | -2.86754500 | -0.61776400 |
| H | -2.65089900 | -2.33375700 | -2.24353700 |
| C | -0.41011500 | 2.34931100  | -1.36855800 |
| C | -0.63397700 | 3.68723400  | -1.67541100 |
| C | -1.82486100 | 4.28107900  | -1.28459000 |
| C | -2.77342200 | 3.50390700  | -0.63306400 |
| C | -2.48530200 | 2.16807000  | -0.39011100 |
| H | 0.50100200  | 1.84667000  | -1.67782500 |

|   |             |             |             |
|---|-------------|-------------|-------------|
| H | 0.12671200  | 4.24344100  | -2.21005300 |
| H | -2.02029100 | 5.32709600  | -1.49405300 |
| H | -3.73171000 | 3.89596800  | -0.31651200 |
| N | -1.31224400 | 1.60470000  | -0.71950500 |
| C | -3.54647200 | 1.32009300  | 0.23723500  |
| O | -3.34442500 | 0.01975100  | -0.01153000 |
| H | -3.95487400 | -0.49671800 | 0.53458600  |
| O | -4.47931900 | 1.76170600  | 0.85204200  |
| I | -1.06910100 | -1.09705700 | 2.36160900  |
| H | 2.31686200  | -0.88703100 | -0.89763800 |

## 29

|    |             |             |             |
|----|-------------|-------------|-------------|
| Zn | 0.30544600  | -0.84061200 | 0.13917400  |
| O  | -1.13804200 | 0.02608000  | -0.72079200 |
| C  | -1.90556100 | 1.02876800  | -0.18185800 |
| H  | -1.76877700 | 1.09644700  | 0.91693600  |
| C  | -1.59208400 | 2.39669500  | -0.78108900 |
| C  | -0.82520600 | 2.51059300  | -1.93932400 |
| C  | -2.07900600 | 3.55604800  | -0.17518500 |
| C  | -0.53940300 | 3.76445300  | -2.47938500 |
| H  | -0.48254600 | 1.59975600  | -2.41918000 |
| C  | -1.79518700 | 4.80637900  | -0.71064900 |
| H  | -2.69126700 | 3.47091200  | 0.71757000  |
| C  | -1.02086900 | 4.91448900  | -1.86463100 |
| H  | 0.05107100  | 3.84009800  | -3.38729500 |
| H  | -2.17947100 | 5.70077400  | -0.23032800 |

|   |             |             |             |
|---|-------------|-------------|-------------|
| H | -0.80022800 | 5.89115300  | -2.28307300 |
| O | 1.22402900  | 1.30248700  | 0.34109000  |
| H | 0.83342300  | 1.84521800  | -0.36751500 |
| O | 2.60236500  | 1.70885800  | 0.37133500  |
| C | 2.81571800  | 2.66568600  | 1.44981800  |
| C | 2.47762500  | 2.02889400  | 2.79046400  |
| H | 2.66927000  | 2.73708200  | 3.60143500  |
| H | 1.42701600  | 1.73784300  | 2.82820300  |
| H | 3.08319100  | 1.13584000  | 2.96054300  |
| C | 2.00072200  | 3.92710700  | 1.19061300  |
| H | 2.22484500  | 4.68212300  | 1.94870600  |
| H | 2.23757800  | 4.34544200  | 0.20874200  |
| H | 0.92926000  | 3.72066300  | 1.23308200  |
| C | 4.31117200  | 2.93346600  | 1.31308700  |
| H | 4.62242300  | 3.65728800  | 2.07000200  |
| H | 4.88508700  | 2.01548700  | 1.46071400  |
| H | 4.54560000  | 3.34106100  | 0.32672400  |
| C | -3.82891200 | -0.26770400 | 0.30292900  |
| H | -3.34685800 | -1.20749800 | 0.00064500  |
| H | -3.63186600 | -0.13667300 | 1.38002000  |
| C | -5.32135600 | -0.32782400 | 0.03968700  |
| H | -5.76874700 | 0.62707100  | 0.33954200  |
| H | -5.48058300 | -0.41800400 | -1.04128400 |
| C | -6.00952500 | -1.47974400 | 0.76835000  |
| H | -5.54985400 | -2.42923600 | 0.46646600  |
| H | -5.83068000 | -1.38811600 | 1.84694200  |

|   |             |             |             |
|---|-------------|-------------|-------------|
| C | -7.51142200 | -1.53752400 | 0.50636900  |
| H | -7.97923800 | -2.37088600 | 1.03836200  |
| H | -8.00502100 | -0.61625500 | 0.83221900  |
| H | -7.72224500 | -1.66364500 | -0.56053400 |
| O | -3.28760200 | 0.82219000  | -0.42059500 |
| C | 3.18158000  | -1.21509800 | -0.78940400 |
| C | 4.26233600  | -1.59091800 | -1.57821100 |
| C | 4.02417100  | -2.22607200 | -2.78940200 |
| C | 2.71136800  | -2.46700400 | -3.17409500 |
| C | 1.69102800  | -2.08003800 | -2.31777000 |
| H | 3.31509800  | -0.69225700 | 0.15007300  |
| H | 5.26990800  | -1.37929500 | -1.24141200 |
| H | 4.84755200  | -2.52752500 | -3.42750200 |
| H | 2.45790000  | -2.94428600 | -4.11242200 |
| N | 1.91973500  | -1.45866900 | -1.15065100 |
| C | 0.26330500  | -2.30393300 | -2.70798800 |
| O | -0.51950700 | -2.36601200 | -1.62113100 |
| H | -1.42301900 | -2.08738500 | -1.83693500 |
| O | -0.11264300 | -2.40172700 | -3.84271000 |
| I | 0.65373400  | -1.94546200 | 2.38430900  |

**TS<sub>29-34</sub>**

|    |             |             |             |
|----|-------------|-------------|-------------|
| Zn | 0.38349200  | -0.52895400 | -0.51278500 |
| O  | -0.37221300 | 1.19624300  | -0.99527100 |
| C  | -1.09735900 | 1.81750900  | -0.07614300 |
| H  | -0.95066900 | 1.14232900  | 0.95069300  |

|   |             |             |             |
|---|-------------|-------------|-------------|
| C | -0.63676200 | 3.19500400  | 0.34486900  |
| C | 0.63709000  | 3.63385000  | -0.01298300 |
| C | -1.45190200 | 4.01977700  | 1.12429900  |
| C | 1.09173800  | 4.88206000  | 0.39942400  |
| H | 1.25039600  | 2.99564800  | -0.63785900 |
| C | -0.99554500 | 5.26551500  | 1.53604200  |
| H | -2.44638000 | 3.68138900  | 1.39046500  |
| C | 0.27853600  | 5.69960600  | 1.17752500  |
| H | 2.07981800  | 5.22102400  | 0.10454900  |
| H | -1.63742200 | 5.90307000  | 2.13548700  |
| H | 0.63261300  | 6.67367600  | 1.49906700  |
| O | -0.23943900 | 0.10676400  | 1.62466500  |
| H | 0.35912900  | 0.75068800  | 2.02718600  |
| O | 0.75290800  | -1.16712100 | 2.46234500  |
| C | 0.01592000  | -1.68512500 | 3.54121000  |
| C | -1.31271200 | -2.28378300 | 3.08088800  |
| H | -1.83619400 | -2.75550200 | 3.91820100  |
| H | -1.95272200 | -1.49937300 | 2.67155800  |
| H | -1.14420900 | -3.02906200 | 2.30146500  |
| C | -0.20079400 | -0.61743300 | 4.61745700  |
| H | -0.68998900 | -1.03717900 | 5.50126100  |
| H | 0.75722500  | -0.18771100 | 4.92505800  |
| H | -0.83655000 | 0.18358700  | 4.23135600  |
| C | 0.93817000  | -2.79993400 | 4.07398600  |
| H | 0.46285900  | -3.29146400 | 4.92856000  |
| H | 1.11810500  | -3.54354300 | 3.29493200  |

|   |             |             |             |
|---|-------------|-------------|-------------|
| H | 1.89635200  | -2.38685600 | 4.39963100  |
| C | -3.05851700 | 0.63551700  | -0.74604800 |
| H | -2.65290700 | 0.39925000  | -1.73486300 |
| H | -2.79464200 | -0.19306300 | -0.07364300 |
| C | -4.56082900 | 0.82714900  | -0.80017800 |
| H | -4.92766500 | 1.05945800  | 0.20657700  |
| H | -4.77927300 | 1.70246700  | -1.42302800 |
| C | -5.28611800 | -0.39975000 | -1.34946400 |
| H | -4.91346800 | -0.62100100 | -2.35698500 |
| H | -5.03696600 | -1.27550300 | -0.73807100 |
| C | -6.80058400 | -0.22266300 | -1.39420800 |
| H | -7.29440400 | -1.11289300 | -1.79361800 |
| H | -7.20742900 | -0.03769000 | -0.39475000 |
| H | -7.08191400 | 0.62556400  | -2.02668100 |
| O | -2.47452500 | 1.84460600  | -0.26620700 |
| C | 3.15455700  | -0.56867600 | 0.74471500  |
| C | 4.52300100  | -0.37178000 | 0.89769500  |
| C | 5.24964500  | 0.17670700  | -0.14828100 |
| C | 4.58456000  | 0.50125600  | -1.32372400 |
| C | 3.22172900  | 0.25490300  | -1.40781300 |
| H | 2.53693400  | -0.97247400 | 1.54319500  |
| H | 4.99750700  | -0.64494600 | 1.83259800  |
| H | 6.31641200  | 0.34806300  | -0.05512400 |
| H | 5.08878100  | 0.93397600  | -2.17855900 |
| N | 2.51342700  | -0.25936100 | -0.38816000 |
| C | 2.52343800  | 0.57727800  | -2.69272200 |



|   |             |             |             |
|---|-------------|-------------|-------------|
| O | 1.35815100  | -0.06996300 | -2.79192700 |
| H | 0.87305300  | 0.25421000  | -3.56350400 |
| O | 2.97651400  | 1.30752700  | -3.53186600 |
| I | -0.38113000 | -2.87864800 | -1.02486200 |

**Structure 30**

|    |             |             |             |
|----|-------------|-------------|-------------|
| C  | -2.25436800 | -1.98032800 | 0.00138700  |
| H  | -2.74104000 | -2.41338100 | -0.88333200 |
| O  | -0.88547700 | -2.33894200 | -0.00116600 |
| Zn | 0.32121500  | -1.00104700 | 0.00000500  |
| C  | -2.44297500 | -0.48331700 | 0.00076000  |
| C  | -2.48241900 | 0.22974200  | -1.20386200 |
| C  | -2.48000600 | 0.23094800  | 1.20475300  |
| C  | -2.55003500 | 1.61929100  | -1.20470100 |
| H  | -2.46906100 | -0.31496200 | -2.14390600 |
| C  | -2.54760900 | 1.62051800  | 1.20437400  |
| H  | -2.46487500 | -0.31283400 | 2.14531500  |
| C  | -2.58059300 | 2.31627600  | -0.00047600 |
| H  | -2.58420500 | 2.15855000  | -2.14553600 |
| H  | -2.57985700 | 2.16070600  | 2.14474300  |
| H  | -2.63327500 | 3.39973700  | -0.00096900 |
| H  | -2.73776900 | -2.41209100 | 0.88854700  |
| I  | 2.25821700  | 0.47468700  | -0.00017100 |

**30a**

|    |             |            |            |
|----|-------------|------------|------------|
| Zn | 0.94805200  | 0.03802300 | 0.00045500 |
| O  | -0.82564300 | 0.19360600 | 0.00111600 |

|   |             |             |             |
|---|-------------|-------------|-------------|
| C | -1.74845100 | -0.87144300 | 0.00080200  |
| H | -1.61537000 | -1.51484700 | 0.88438300  |
| H | -1.61474300 | -1.51499000 | -0.88257900 |
| C | -3.17179400 | -0.35926200 | 0.00024600  |
| C | -3.45468900 | 1.00303000  | 0.00027300  |
| C | -4.22884500 | -1.27225400 | -0.00027300 |
| C | -4.77494600 | 1.44684700  | -0.00021400 |
| H | -2.62999800 | 1.70539200  | 0.00067600  |
| C | -5.54552400 | -0.83028200 | -0.00075500 |
| H | -4.02016400 | -2.33944900 | -0.00030000 |
| C | -5.82348300 | 0.53468800  | -0.00072600 |
| H | -4.98300300 | 2.51226400  | -0.00018800 |
| H | -6.35707600 | -1.55098400 | -0.00115600 |
| H | -6.85148400 | 0.88195500  | -0.00110400 |
| I | 3.37211000  | 0.02307900  | -0.00034800 |

### **TS30a-31**

|    |             |             |             |
|----|-------------|-------------|-------------|
| C  | -1.47031100 | -1.11331100 | 0.58158600  |
| H  | -0.66882000 | -1.07609000 | -0.83275300 |
| O  | -0.66882600 | -0.63485300 | 1.48245300  |
| Zn | 0.66629900  | -0.49931000 | 0.00634900  |
| C  | -2.70106500 | -0.38166800 | 0.19669200  |
| C  | -3.67592300 | -1.00799500 | -0.58380100 |
| C  | -2.90657200 | 0.92021300  | 0.65651300  |
| C  | -4.84249200 | -0.33285900 | -0.91372400 |
| H  | -3.51453900 | -2.02378200 | -0.93413100 |
| C  | -4.07702800 | 1.59152500  | 0.32993300  |

|   |             |             |             |
|---|-------------|-------------|-------------|
| H | -2.14924500 | 1.37826200  | 1.28283700  |
| C | -5.04225400 | 0.96857000  | -0.45795700 |
| H | -5.59860800 | -0.81886800 | -1.52074200 |
| H | -4.24120000 | 2.60095000  | 0.69155900  |
| H | -5.95524900 | 1.49606900  | -0.71370000 |
| H | -1.56291700 | -2.20558500 | 0.48346200  |
| I | 2.96879400  | 0.31774200  | -0.17664300 |

**31**

|    |             |             |             |
|----|-------------|-------------|-------------|
| C  | -1.71580500 | 0.80486400  | -0.00001300 |
| H  | 0.78125500  | 2.67163600  | 0.00000300  |
| O  | -0.68113400 | 0.15068300  | -0.00006800 |
| Zn | 1.28620400  | 1.21447100  | -0.00004200 |
| C  | -3.04996800 | 0.21526500  | -0.00000100 |
| C  | -4.16665900 | 1.05811700  | 0.00007200  |
| C  | -3.21634800 | -1.17618700 | -0.00006300 |
| C  | -5.44408600 | 0.51532500  | 0.00008100  |
| H  | -4.02696100 | 2.13521400  | 0.00012000  |
| C  | -4.49258100 | -1.71266400 | -0.00005300 |
| H  | -2.33564200 | -1.80863400 | -0.00011800 |
| C  | -5.60395300 | -0.86776300 | 0.00001800  |
| H  | -6.31272100 | 1.16417300  | 0.00013600  |
| H  | -4.62997200 | -2.78829200 | -0.00010200 |
| H  | -6.60215000 | -1.29313300 | 0.00002500  |
| H  | -1.66269400 | 1.90913600  | 0.00004500  |
| I  | 2.97713600  | -0.61606500 | 0.00002700  |

**32**

|    |             |             |             |
|----|-------------|-------------|-------------|
| Zn | 0.24676400  | 0.10538600  | -0.37888300 |
| O  | -0.30785600 | -1.43505600 | -1.24980700 |
| C  | -1.64312800 | -1.64275200 | -1.64844200 |
| H  | -1.74797700 | -2.70581500 | -1.91078800 |
| C  | -2.66181400 | -1.29150200 | -0.58646800 |
| C  | -2.40352600 | -1.55463100 | 0.76221000  |
| C  | -3.88127100 | -0.70861900 | -0.93417600 |
| C  | -3.34284700 | -1.23680400 | 1.73827600  |
| H  | -1.46453100 | -2.01923700 | 1.04933200  |
| C  | -4.82372100 | -0.39654800 | 0.03972300  |
| H  | -4.09020800 | -0.48781000 | -1.97733300 |
| C  | -4.55587400 | -0.65790400 | 1.37986800  |
| H  | -3.12676000 | -1.44574300 | 2.78099900  |
| H  | -5.76374500 | 0.06382900  | -0.24680000 |
| H  | -5.28697700 | -0.40688500 | 2.14112000  |
| H  | -1.86856100 | -1.07282200 | -2.56065000 |
| O  | 1.20959000  | -2.49181100 | 0.51795900  |
| H  | 0.57907500  | -2.37265600 | -0.25145600 |
| O  | 1.77767300  | -1.16761100 | 0.53866100  |
| C  | 3.21974800  | -1.24078700 | 0.25170500  |
| C  | 3.43376000  | -1.81169200 | -1.14253300 |
| H  | 4.50233900  | -1.83880700 | -1.37155600 |
| H  | 3.04262700  | -2.82788100 | -1.20716700 |
| H  | 2.93821700  | -1.19776300 | -1.89961000 |
| C  | 3.86368000  | -2.09952200 | 1.33126800  |
| H  | 4.94385200  | -2.14761900 | 1.16997000  |
| H  | 3.67747600  | -1.67275000 | 2.31948300  |
| H  | 3.46196100  | -3.11279400 | 1.30631200  |

|   |            |            |             |
|---|------------|------------|-------------|
| C | 3.67307700 | 0.20797500 | 0.35146100  |
| H | 4.75799900 | 0.25086000 | 0.22729800  |
| H | 3.22207000 | 0.83100900 | -0.42497700 |
| H | 3.42106500 | 0.63070500 | 1.32627100  |
| I | 0.27727100 | 2.52307800 | 0.06007900  |

**32a**

|    |             |             |             |
|----|-------------|-------------|-------------|
| Zn | 0.24773100  | -0.10550700 | 0.37902900  |
| O  | -0.30793400 | 1.43466900  | 1.24959800  |
| C  | -1.64321500 | 1.64227300  | 1.64842700  |
| H  | -1.74795800 | 2.70527100  | 1.91104900  |
| C  | -2.66197200 | 1.29132700  | 0.58647400  |
| C  | -2.40377200 | 1.55462900  | -0.76217600 |
| C  | -3.88151200 | 0.70866200  | 0.93423400  |
| C  | -3.34327100 | 1.23718200  | -1.73817600 |
| H  | -1.46464900 | 2.01896200  | -1.04929900 |
| C  | -4.82415400 | 0.39697000  | -0.03960500 |
| H  | -4.09036400 | 0.48770500  | 1.97737800  |
| C  | -4.55640400 | 0.65851400  | -1.37972700 |
| H  | -3.12726200 | 1.44622200  | -2.78089500 |
| H  | -5.76424900 | -0.06323900 | 0.24694900  |
| H  | -5.28765400 | 0.40782100  | -2.14094400 |
| H  | -1.86852000 | 1.07210400  | 2.56049500  |
| O  | 1.20965900  | 2.49203600  | -0.51728800 |
| H  | 0.57865000  | 2.37237500  | 0.25174800  |
| O  | 1.77774000  | 1.16780500  | -0.53850300 |
| C  | 3.21974300  | 1.24085300  | -0.25178900 |
| C  | 3.43409200  | 1.81116100  | 1.14264700  |
| H  | 4.50274600  | 1.83846500  | 1.37129600  |

|   |            |             |             |
|---|------------|-------------|-------------|
| H | 3.04263000 | 2.82717900  | 1.20786600  |
| H | 2.93903500 | 1.19671200  | 1.89962700  |
| C | 3.86355000 | 2.10004700  | -1.33109300 |
| H | 4.94380600 | 2.14758900  | -1.17023000 |
| H | 3.67672900 | 1.67394600  | -2.31948100 |
| H | 3.46223700 | 3.11345900  | -1.30537000 |
| C | 3.67303500 | -0.20789400 | -0.35229600 |
| H | 4.75804000 | -0.25086800 | -0.22892600 |
| H | 3.22254700 | -0.83116900 | 0.42425400  |
| H | 3.42035600 | -0.63027900 | -1.32708600 |
| I | 0.27697200 | -2.52312200 | -0.06021300 |

### TS32a-33

|    |             |             |             |
|----|-------------|-------------|-------------|
| Zn | -0.56976600 | -0.38572200 | 0.11942400  |
| O  | 1.24580100  | -0.98946400 | 0.14428400  |
| C  | 2.11260300  | -0.50823100 | -0.75373800 |
| H  | 1.75469100  | 0.62204900  | -1.03068100 |
| C  | 3.53528500  | -0.38802800 | -0.31235900 |
| C  | 3.87855800  | -0.53729500 | 1.03297600  |
| C  | 4.53705900  | -0.10551600 | -1.24736200 |
| C  | 5.20227000  | -0.40668800 | 1.43454600  |
| H  | 3.09573700  | -0.77760200 | 1.74322600  |
| C  | 5.85844800  | 0.02745500  | -0.84420400 |
| H  | 4.27619100  | 0.00667400  | -2.29651000 |
| C  | 6.19423900  | -0.12089600 | 0.49992200  |
| H  | 5.46401800  | -0.53436200 | 2.47995900  |
| H  | 6.62941200  | 0.24267200  | -1.57668200 |
| H  | 7.22717600  | -0.01971000 | 0.81614500  |

|   |             |             |             |
|---|-------------|-------------|-------------|
| H | 2.03062100  | -0.94809200 | -1.76568900 |
| O | 0.59332200  | 1.48373800  | -0.56072200 |
| H | 1.13951200  | 1.75149900  | 0.19253700  |
| O | -0.84391900 | 1.66863400  | 0.53021900  |
| C | -1.78511500 | 2.64071900  | 0.08766400  |
| C | -2.24714900 | 2.35161100  | -1.33738100 |
| H | -2.97844400 | 3.09762900  | -1.66003500 |
| H | -1.39552400 | 2.38832400  | -2.02098800 |
| H | -2.71381900 | 1.36562700  | -1.40373900 |
| C | -1.13926500 | 4.01888700  | 0.19985500  |
| H | -1.85025900 | 4.80256700  | -0.07473000 |
| H | -0.80056800 | 4.20028700  | 1.22304700  |
| H | -0.27988000 | 4.08513000  | -0.47210000 |
| C | -2.94590000 | 2.49290700  | 1.08665500  |
| H | -3.71678500 | 3.23145200  | 0.84634700  |
| H | -3.38356900 | 1.49501400  | 1.02423900  |
| H | -2.59946700 | 2.66760400  | 2.10735400  |
| I | -2.67875300 | -1.70184700 | -0.03215300 |

### 33

|    |             |             |             |
|----|-------------|-------------|-------------|
| Zn | 0.94838900  | -0.08459900 | 0.04067100  |
| O  | -1.05027500 | -0.65498700 | 0.09777100  |
| C  | -1.96023600 | 0.12597500  | 0.39451700  |
| H  | -1.47289300 | 1.97761000  | -2.26644000 |
| C  | -3.36774300 | -0.21615200 | 0.24661900  |
| C  | -3.75610300 | -1.49083800 | -0.18504800 |
| C  | -4.33267900 | 0.75148800  | 0.54489700  |
| C  | -5.10228200 | -1.79188100 | -0.30773700 |
| H  | -2.99040600 | -2.22420600 | -0.41163400 |

|   |             |             |             |
|---|-------------|-------------|-------------|
| C | -5.67999800 | 0.44618500  | 0.41616200  |
| H | -4.01637100 | 1.74213500  | 0.85439800  |
| C | -6.06211500 | -0.82432700 | -0.00716800 |
| H | -5.41131000 | -2.77792000 | -0.63685900 |
| H | -6.43207200 | 1.19438300  | 0.64037600  |
| H | -7.11587600 | -1.06396100 | -0.10592200 |
| H | -1.72424500 | 1.10386400  | 0.82791000  |
| O | -1.61621000 | 2.16097800  | -1.33554400 |
| H | -0.72066300 | 2.13022700  | -0.92651000 |
| O | 0.68073800  | 1.74441400  | 0.00934700  |
| C | 1.72505600  | 2.71087700  | 0.11774400  |
| C | 2.59512100  | 2.39899100  | 1.33677100  |
| H | 3.38409200  | 3.14560100  | 1.47018400  |
| H | 1.98193500  | 2.38168400  | 2.24241300  |
| H | 3.07881700  | 1.42141600  | 1.22737100  |
| C | 1.04663600  | 4.07182300  | 0.29044400  |
| H | 1.78419900  | 4.87674900  | 0.36124400  |
| H | 0.38703900  | 4.27970700  | -0.55633100 |
| H | 0.44017600  | 4.07664000  | 1.20023200  |
| C | 2.57040800  | 2.69482500  | -1.15869800 |
| H | 3.36441500  | 3.44738800  | -1.12697800 |
| H | 3.03982400  | 1.71470500  | -1.29496700 |
| H | 1.94125600  | 2.89765200  | -2.03021000 |
| I | 2.48792500  | -2.01982500 | -0.01871700 |

901599

|   |             |             |             |
|---|-------------|-------------|-------------|
| C | -2.00728000 | -0.52217000 | -1.89006700 |
| H | -2.25479200 | 0.54273900  | -1.91413500 |
| O | -0.60008400 | -0.68119000 | -1.59337600 |



|    |             |             |             |
|----|-------------|-------------|-------------|
| Zn | 0.65192000  | 0.61951500  | -0.43302000 |
| C  | -2.82454900 | -1.23566700 | -0.85327200 |
| C  | -3.71522000 | -0.53272500 | -0.04441400 |
| C  | -2.70498600 | -2.61875500 | -0.69363100 |
| C  | -4.48571100 | -1.20143600 | 0.90282600  |
| H  | -3.79917100 | 0.54429600  | -0.14958900 |
| C  | -3.46736100 | -3.28587300 | 0.25556300  |
| H  | -2.00720100 | -3.17141200 | -1.31529600 |
| C  | -4.36266800 | -2.57739500 | 1.05429500  |
| H  | -5.17615500 | -0.64387000 | 1.52671700  |
| H  | -3.36891900 | -4.36030600 | 0.37058100  |
| H  | -4.96141000 | -3.09909100 | 1.79364700  |
| H  | -2.18861500 | -0.94691800 | -2.88248800 |
| I  | -0.61584800 | 2.56382600  | 0.48588500  |
| C  | 1.86302100  | -0.88848400 | 2.01180100  |
| C  | 2.84754900  | -1.66472700 | 2.60235700  |
| C  | 3.90906400  | -2.10916700 | 1.81865000  |
| C  | 3.95202900  | -1.76457600 | 0.47518600  |
| C  | 2.93077400  | -0.98159600 | -0.04639800 |
| H  | 1.01643200  | -0.51056500 | 2.57497000  |
| H  | 2.78087500  | -1.91145700 | 3.65504200  |
| H  | 4.69470000  | -2.71674500 | 2.25526300  |
| H  | 4.74675800  | -2.07542400 | -0.19126700 |
| N  | 1.91067000  | -0.56213200 | 0.71608400  |
| C  | 2.92181600  | -0.56939900 | -1.52093800 |
| O  | 1.93937600  | 0.20099500  | -1.86083000 |
| H  | -0.06846900 | -0.66958900 | -2.40103100 |
| O  | 3.80505500  | -0.99519700 | -2.23680200 |

901623

|    |             |             |             |
|----|-------------|-------------|-------------|
| C  | 1.85424000  | -0.89241800 | -2.30040000 |
| H  | 1.80649300  | -1.99385200 | -2.33988100 |
| O  | 0.58323800  | -0.30979800 | -2.21990200 |
| Zn | -0.43941700 | -0.51373600 | -0.69306400 |
| C  | 2.73905400  | -0.49203300 | -1.13794100 |
| C  | 2.87016500  | -1.32015800 | -0.01971800 |
| C  | 3.37623600  | 0.75251600  | -1.12159000 |
| C  | 3.61819100  | -0.91903400 | 1.08602300  |
| H  | 2.38632600  | -2.29322600 | -0.01843200 |
| C  | 4.13004000  | 1.15507500  | -0.02474000 |
| H  | 3.28013300  | 1.40495200  | -1.98459000 |
| C  | 4.25209000  | 0.31978200  | 1.08505600  |
| H  | 3.71540100  | -1.58056700 | 1.94106800  |
| H  | 4.63297900  | 2.11733100  | -0.03684400 |
| H  | 4.84946100  | 0.62790400  | 1.93740700  |
| H  | 2.32694400  | -0.56149700 | -3.23725300 |
| I  | -1.41724700 | -2.26638800 | 0.82601900  |
| C  | 0.52372800  | 1.64959900  | 1.23630300  |
| C  | 0.57873600  | 2.86299300  | 1.91390200  |
| C  | -0.38584400 | 3.82540700  | 1.65112500  |
| C  | -1.37277500 | 3.54890000  | 0.71275300  |
| C  | -1.35274500 | 2.31325600  | 0.08158300  |
| H  | 1.26300700  | 0.87354300  | 1.40659200  |
| H  | 1.37060500  | 3.03831300  | 2.63184300  |
| H  | -0.37042400 | 4.77978100  | 2.16555900  |
| H  | -2.15029200 | 4.25769900  | 0.45720800  |
| N  | -0.42686100 | 1.38099700  | 0.34138100  |
| C  | -2.39911600 | 2.00582300  | -0.93863600 |

|   |             |            |             |
|---|-------------|------------|-------------|
| O | -2.25390700 | 0.76325900 | -1.44454200 |
| O | -3.26517000 | 2.76273200 | -1.27616600 |
| H | -2.93128200 | 0.60553000 | -2.11686000 |
